# Supplementary material for: Identification and characterization of novel filament-forming proteins in cyanobacteria
Source: PubMed Central journal article supplement (PMC7002697; doi:10.1038/s41598-020-58726-9), 2020-02-05
Supplement: 41598_2020_58726_MOESM1_ESM.pdf [file 41598_2020_58726_MOESM1_ESM.pdf]

## Supplementary Materials for

### **Identification and characterization of novel filament-forming proteins in cyanobacteria**

Benjamin L. Springstein\*, Christian Woehle, Julia Weissenbach, Andreas O. Helbig,

Tal Dagan, Karina Stucken\*

\*Corresponding authors: BLS: [benjamin\\_springstein@hms.harvard.edu](mailto:benjamin_springstein@hms.harvard.edu)

KS: [kstucken@userena.cl](mailto:kstucken@userena.cl)

# 1 Supplementary Information

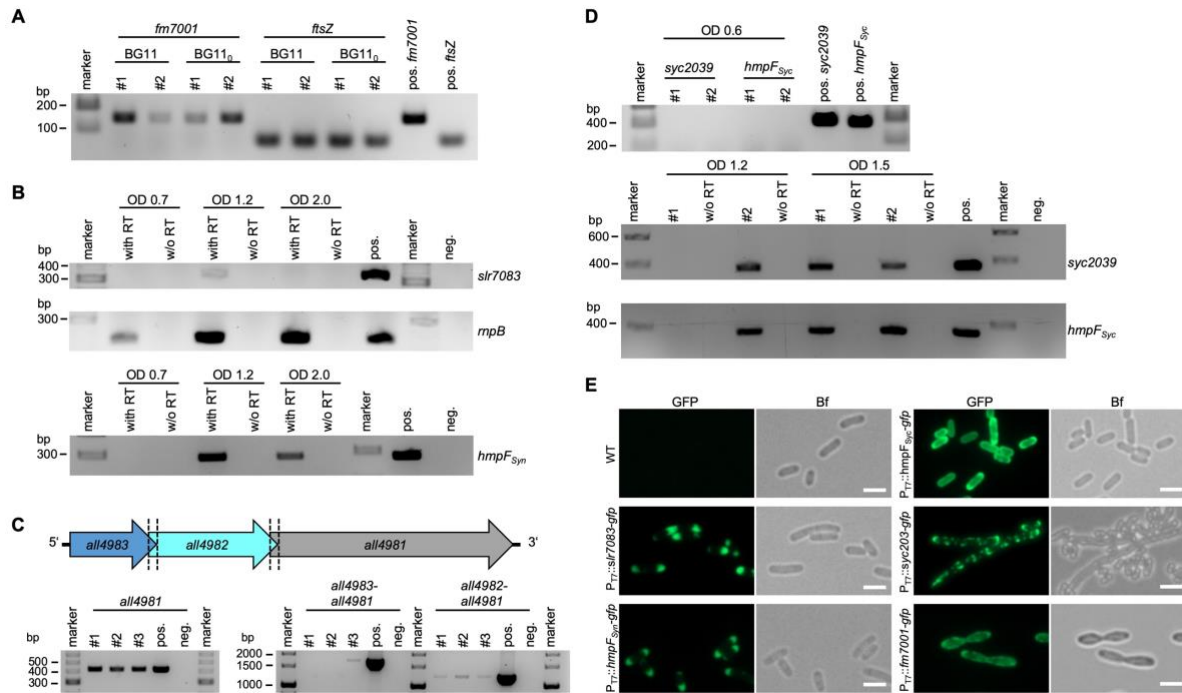

2

## 3 Supplementary Fig. 1: Expression of candidate CCRPs and heterologous expression in *E. coli*

4 (A) RT-PCR of reverse transcribed whole RNA from young *Fischerella* WT cultures grown in BG11 or BG11<sub>o</sub> from  
 5 two independent biological replicates. Gene transcripts were verified using internal *fm7001* gene primers (#1/#2) or  
 6 internal *ftsZ* gene primers (#3/#4) as a control. (B) RT-PCR of reverse transcribed whole RNA from *Synechocystis*  
 7 WT (OD<sub>750</sub> 0.7, 1.2 or 2.0) grown in BG11 using internal *slr7083* gene primers (#5/#6) or internal *hmpF<sub>Syn</sub>* gene  
 8 primers (#9/#10). Internal *mpB* gene primers (#7/#8) were included as a control. (C, top) Schematic representation  
 9 of the genomic context of *all4981*. The 3' end of *all4983* overlaps with 4 bp with the 5' region of *all4982*, which has  
 10 the same overlap with the 5' end of *all4981*. Both overlaps are comprised of the same four nucleotides (ATGA). (C,  
 11 bottom) RT-PCR of reverse transcribed whole RNA from *Anabaena* WT cultures grown in BG11 (OD<sub>750</sub> 1.8) from  
 12 three independent biological replicates. *all4981* gene transcript was internal gene primers (#15/#16). For operon  
 13 structure of *all4983-all4981* or *all4982-all4981*, primer pairs #17/#16 or #18/#16 were used, respectively. Only one  
 14 replicate showed a common transcript for an *all4983-all4981* operon, which is likely is the result of the long fragment  
 15 (about 1800 bp). The employed cDNA synthesis kit is optimized for fragments up to 1000 bp, thus making longer  
 16 reverse transcriptions unlikely. (D) RT-PCR of reverse transcribed whole RNA from *Synechococcus* WT (OD<sub>750</sub> 0.6,  
 17 1.2 or 1.5) grown in BG11 from two independent biological replicates. Gene transcripts were verified using internal  
 18 *syc2039* gene primers (#11/#12) and internal *hmpF<sub>Syc</sub>* gene primers (#13/#14). (B,D) RNA was either reverse  
 19 transcribed in the reaction buffer containing reverse transcriptase (with RT) or without reverse transcriptase (w/o  
 20 RT) as a control for residual genomic DNA contamination. (A-D) Genomic DNA of the respective species was  
 21 included as positive control for the different reactions. Full gel pictures as shown in Extended Data Supplementary  
 22 Fig. 1. (E) GFP fluorescence and bright field micrographs of *E. coli* BL21 (DE3) cells expressing Slr7083-GFP,  
 23 HmpF<sub>Syn</sub>-GFP, HmpF<sub>Syc</sub>-GFP, Syc2039-GFP or Fm7001-GFP. Cells were grown at 20 °C or (Fm7001-GFP) 16 °C  
 24 and protein expression was induced with 0.05 mM IPTG for 24 h. Scale bars: 2.5 μm.

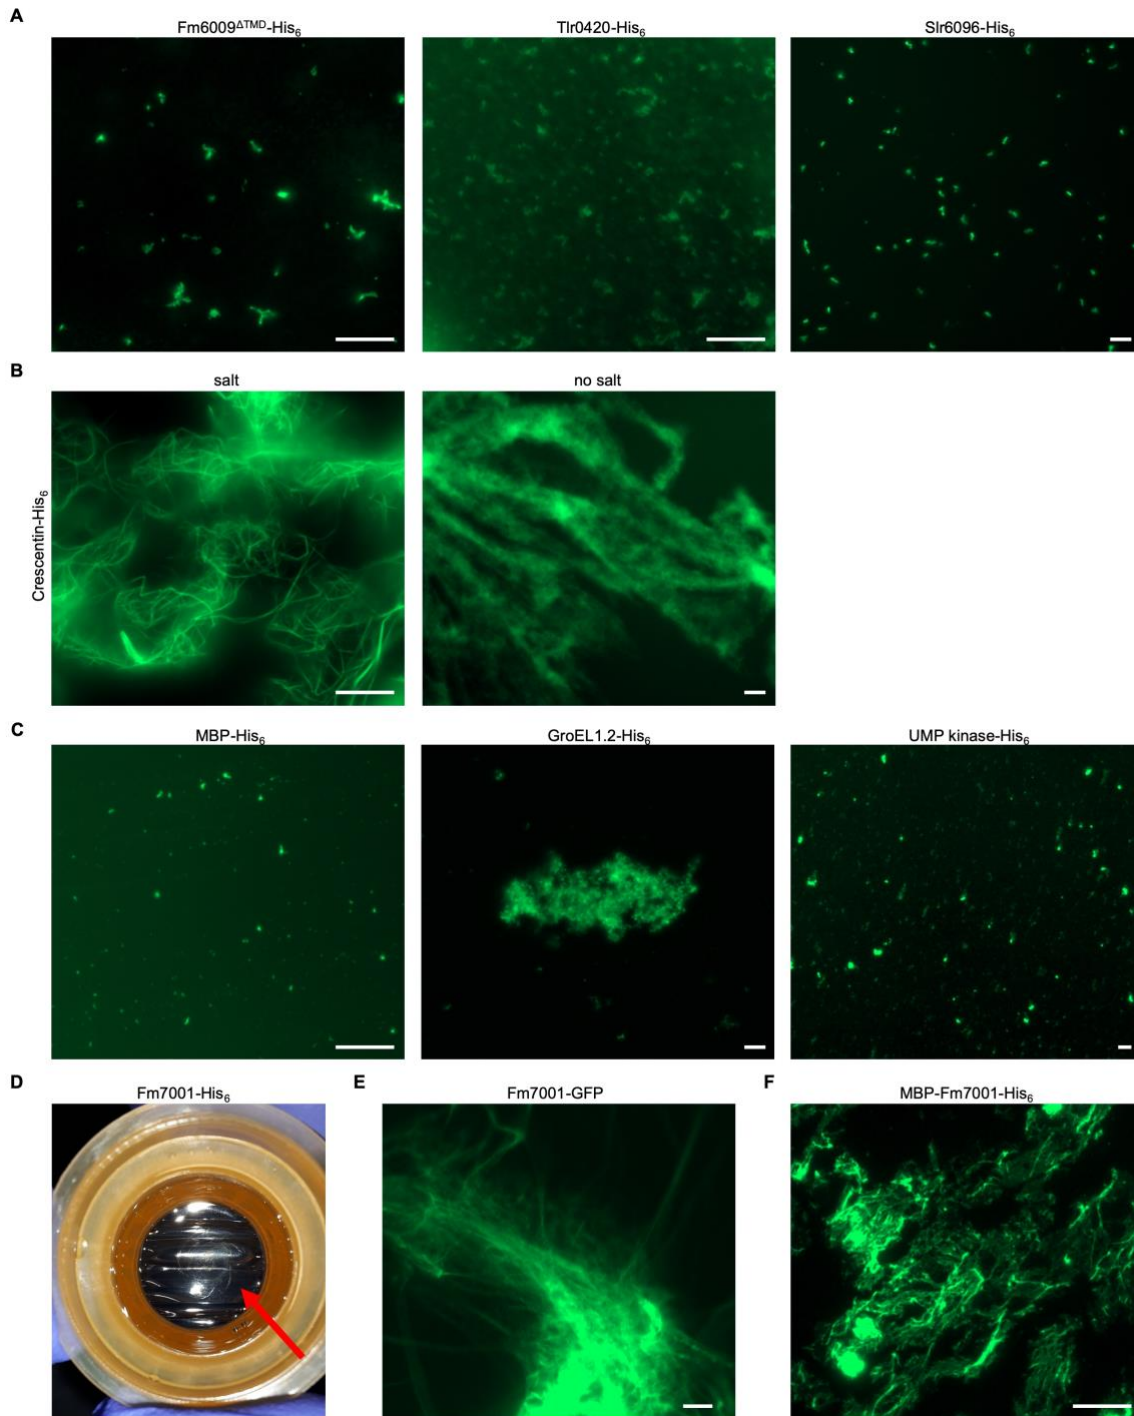

25

26 **Supplementary Fig. 2: *In vitro* polymerization is dependent on monovalent ions**

27 (A-C) NHS-fluorescein fluorescence micrographs of *in vitro* structures formed by purified and renatured  
 28 Fm6009 $\Delta$ TMD-His<sub>6</sub> (lacking the transmembrane domain, i.e. the first 91 aa), Tlr0420-His<sub>6</sub> or Slr6096-His<sub>6</sub>  
 29 (1 mg ml<sup>-1</sup> each), Crescentin-His<sub>6</sub> (0.7 mg ml<sup>-1</sup>), MBP-His<sub>6</sub> (1 mg ml<sup>-1</sup>), GroEL1.2 (0.7 mg ml<sup>-1</sup>) or UMP kinase (0.5  
 30 mg ml<sup>-1</sup>), in HLB or Crescentin-His<sub>6</sub> (0.7 mg ml<sup>-1</sup>) renatured in 25 mM Hepes, pH 7.4. Note: Crescentin-His<sub>6</sub> *in vitro*  
 31 polymerization into smooth filaments is strictly dependent of the presence of salt in the renaturation buffer as  
 32 Crescentin-His<sub>6</sub> without salt assembles into filamentous aggregates only. (A) Proteins were dialyzed in a stepwise  
 33 urea-decreasing manner and stained with an excess of NHS-Fluorescein. (D) Bright field micrograph of a sheet-  
 34 like flat object floating on top of the dialysate (red arrow) formed upon dialysis of Fm7001-His<sub>6</sub> (0.7 mg ml<sup>-1</sup>) into 2  
 35 mM Tris-HCl, 4.5 M urea, pH 7.5. (E,F) Epifluorescence micrographs of filament-like structures formed by (E)  
 36 denatured cell-free extracts of *E. coli* BL21 (DE3) expressing Fm7001-GFP (0.7 mg ml<sup>-1</sup> whole protein) dialyzed  
 37 into 2 mM Tris-HCl, 3 M urea, pH 7.5 or by (F) natively purified MBP-Fm7001-His<sub>6</sub> (0.8 mg ml<sup>-1</sup>) stained with NHS-  
 38 fluorescein in HLB. Scale bars: 10  $\mu$ m.

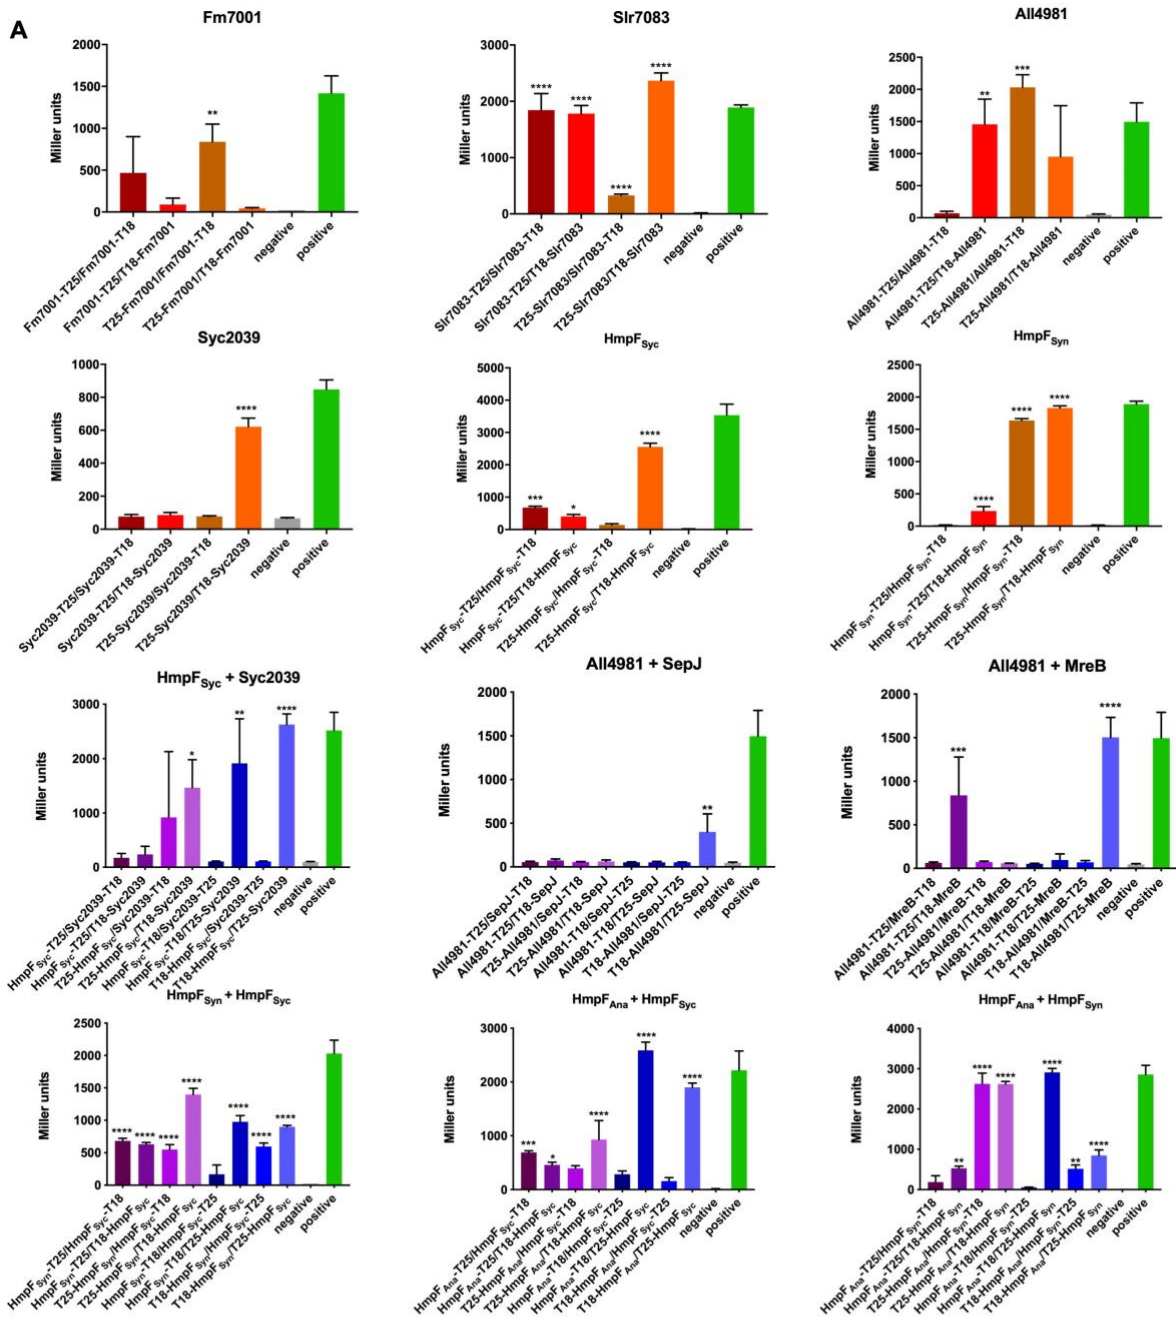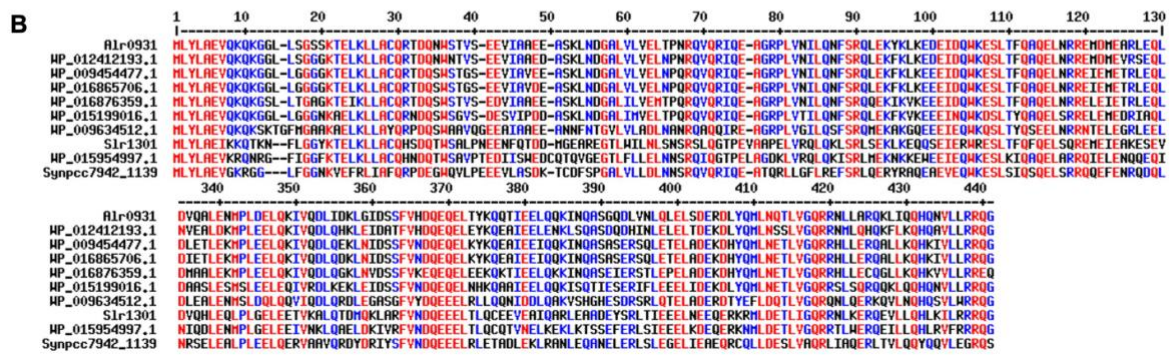

39  
40  
41  
42  
43  
44

**Supplementary Fig. 3: BACTH analysis of cyanobacterial CCRPs**

(A) Beta-galactosidase assays (BACTH) of *E. coli* BTH101 cells co-expressing indicated T25 and T18 translational fusions of all possible pair-wise combinations from three independent colonies grown for 1 d at 30 °C or 2 d at 20 °C. Quantity values are given in Miller Units per milligram LacZ of the mean results from three independent colonies. Negative: N-terminal T25 fusion construct of the respective protein co-transformed with empty pUT18C.

45 Positive: Zip/Zip control. Error bars indicate standard deviations (n=3). Values indicated with \* are significantly  
46 different from the negative control. \*: P < 0.05, \*\*: P<0.01, \*\*\*: P<0.001, \*\*\*\*: P<0.0001 (one-way ANOVA using  
47 Dunnett's multiple comparison test). **(B)** Multiple sequence alignment of selected cyanobacterial homologous  
48 CCRPs using MULTALIGN <sup>1</sup>. Alr0931, Slr1301 (HmpF<sub>Syn</sub>; *Synechocystis*) and Synpcc7942\_1139 (HmpF<sub>Syc</sub>;  
49 *Synechococcus*) are identified by their designated cyanobase locus tag. Other proteins are given as NCBI  
50 accession numbers. WP\_012412193.1 (*Nostoc punctiforme* PCC 73102), WP\_009454477.1 (*Fischerella thermalis*  
51 PCC 7521), WP\_016865706.1 (*Fischerella*), WP\_016876359.1 (*C. fritschii* PCC 9212), WP\_015199016.1  
52 (*Calothrix* sp. PCC 6303), WP\_009634512.1 (*Synechocystis* sp. PCC 7509), and WP\_015954997.1 (*Cyanothece*  
53 sp. PCC 7424). Amino acids from 1-130 and 334-441 are depicted. Red highlighted amino acid residues are  
54 conserved among all listed species, blue amino acids are mostly conserved, and black amino acids are not  
55 conserved. Characteristic for this group of conserved cyanobacterial CCRPs is a highly conserved N-terminus with  
56 a M-L-Y-L-A-E-V sequence motif present in nearly all homologs, followed by a moderately conserved N-terminal  
57 region of the first 120 amino acids. Two other highly conserved domains are present in this group, one located  
58 around the centre of the proteins (between the 340<sup>th</sup> and 370<sup>th</sup> amino acid), and another one shortly thereafter  
59 between the 400<sup>th</sup> and 420<sup>th</sup> amino acid.



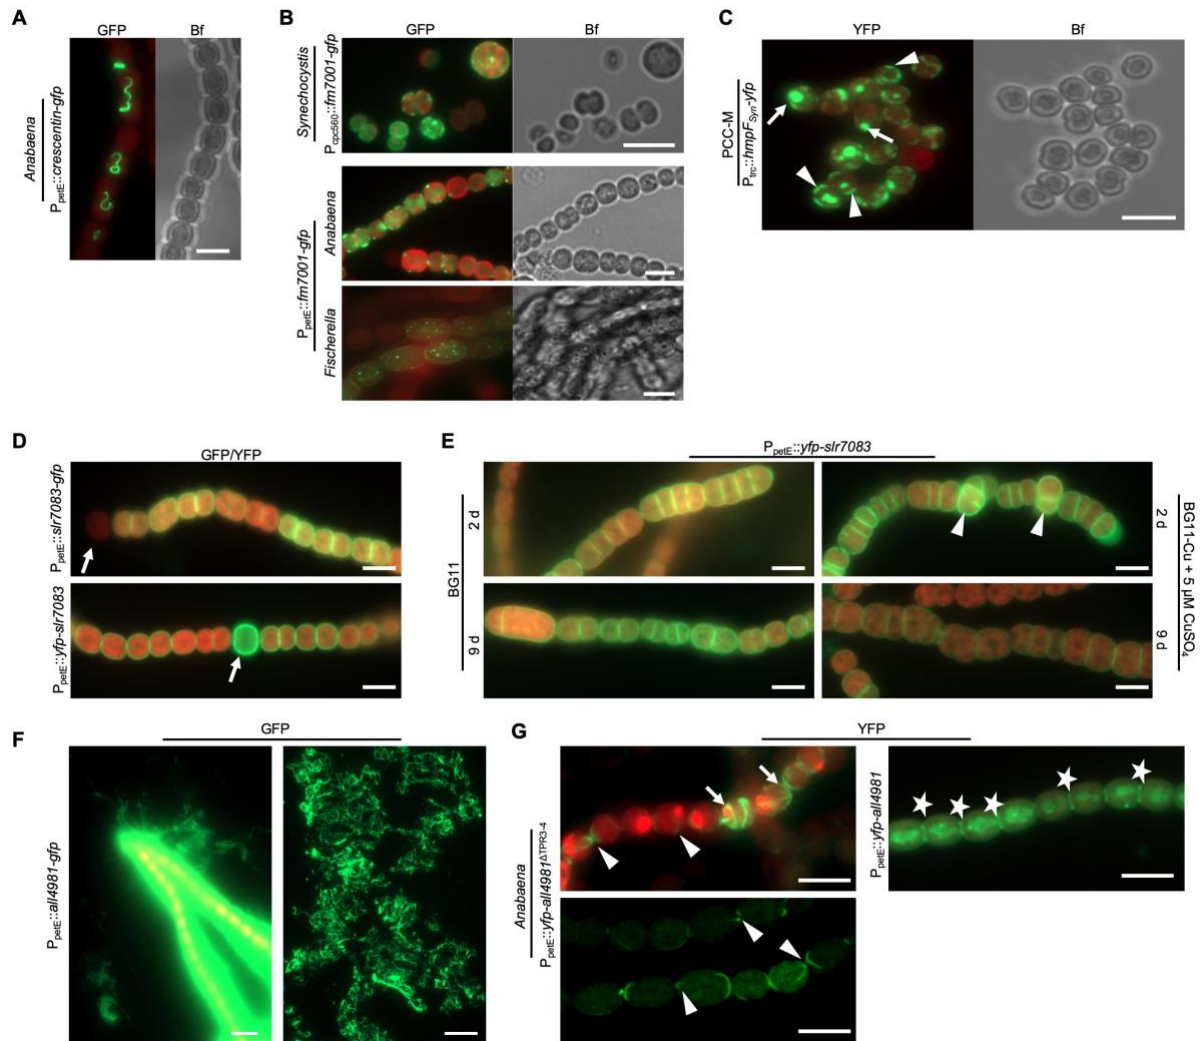

60

61 **Supplementary Fig. 4: Expression of candidate CCRPs in different cyanobacterial species**

62 GFP fluorescence, chlorophyll autofluorescence (red) and bright field micrographs of *Synechocystis*, PCC-M,  
 63 *Anabaena* or *Fischerella* cells expressing (A) Crescentin-GFP, (B) Fm7001-GFP, (C) HmpF<sub>Syn</sub>-YFP, (D) Slr7083-  
 64 GFP, (E) YFP-Slr7083, (F) All4981-GFP or (G) YFP-All4981<sub>ΔTPR3-4</sub> or YFP-All4981 from P<sub>petE</sub>, P<sub>trc</sub>, or P<sub>cpc560</sub>. (B)  
 65 Unlike N-terminal fusion with a YFP tag, no *in vivo* filament-like structures can be observed upon C-terminal fusion  
 66 of Fm7001 with a GFP-tag in any tested cyanobacterium. (C) White triangles mark crescent-like localizations. White  
 67 arrows show HmpF<sub>Syn</sub>-YFP accumulations. (D) *Anabaena* cells were grown on BG11<sub>0</sub> plates. White arrows indicate  
 68 heterocysts. (E) *Anabaena* cells expressing YFP-Slr7083 from P<sub>petE</sub> grown in liquid BG11 or liquid BG11 without  
 69 copper and induced with 5 μM CuSO<sub>4</sub> for 2 and 9 d. White triangles point to multiseriate *Anabaena* trichome growth  
 70 upon protein overexpression. (F) *Anabaena* cells expressing All4981-GFP from P<sub>petE</sub> grown in BG11 supplemented  
 71 with 0.5 μM CuSO<sub>4</sub> for 2 d. Extended period of overexpression of All4981-GFP led to cell rupture. Protein released  
 72 from the *Anabaena* trichome are shown in the left image while the right image shows extracellular (*ex vivo*) filament-  
 73 like structures observed in the growth medium. (G) *Anabaena* cells were grown in BG11<sub>0</sub> supplemented with 0.5  
 74 μM CuSO<sub>4</sub>. White triangles indicate selected filamentous strings traversing through the cells. White arrows point to  
 75 spindle-like YFP-All4981<sub>ΔTPR3-4</sub> structures. White stars mark septal localizations. Scale bars: (A-D,G) 5 μm, (F, left)  
 76 10 μm or (F, right) 20 μm.

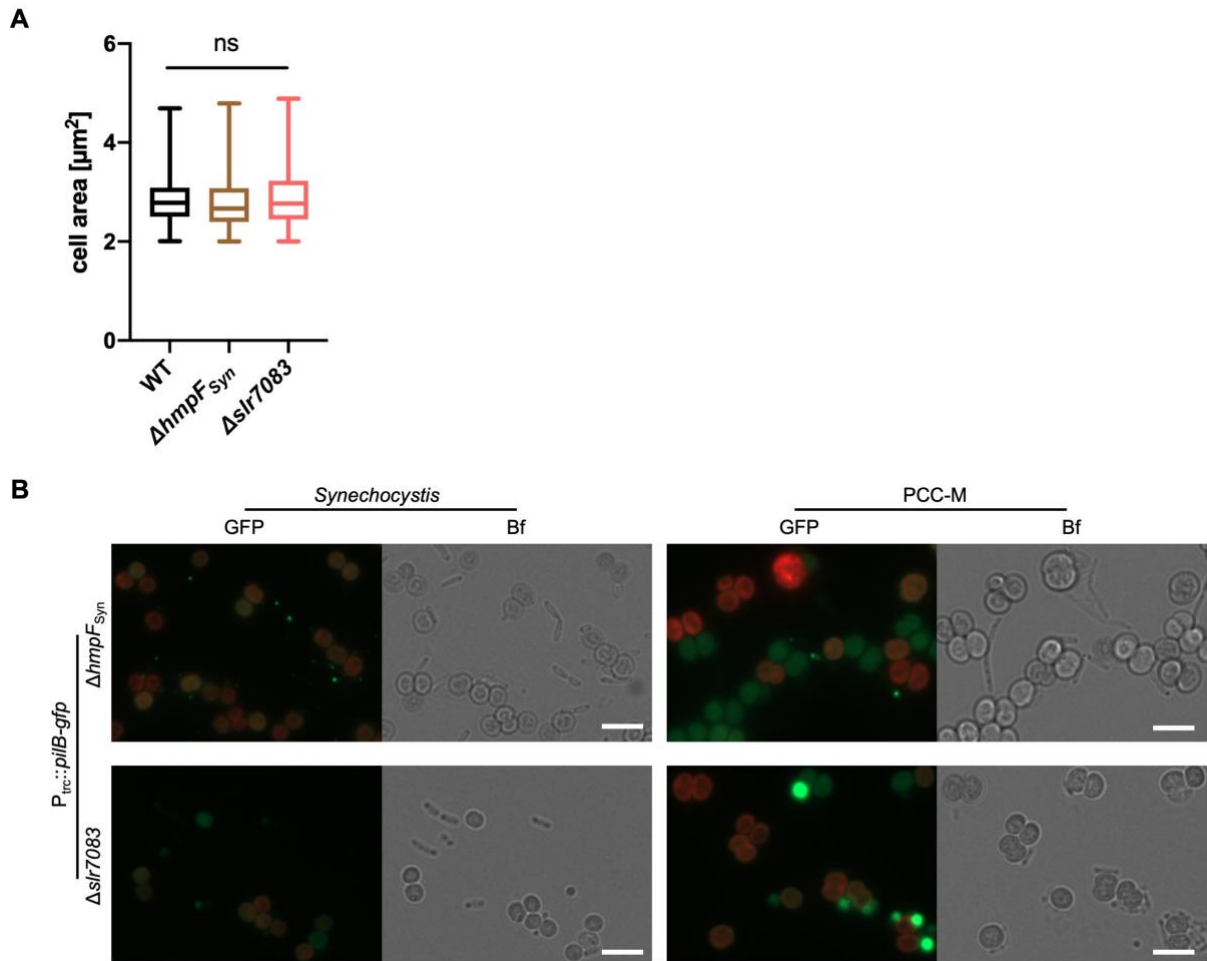

77

78 **Supplementary Fig. 5: *Synechocystis* mutant phenotype and lack of PilB-GFP expression in *Synechocystis***  
 79 **and PCC-M mutant strains**

80 (A) Measurement of cell area of *Synechocystis* WT,  $\Delta hmpF_{Syn}$  and  $\Delta slr7083$  mutants as determined by microbeJ.  
 81 (B) GFP fluorescence, chlorophyll autofluorescence (red) and bright field micrographs of *Synechocystis* or PCC-M  
 82  $\Delta hmpF_{Syn}$  or  $\Delta slr7083$  mutant strains expressing PilB-GFP from  $P_{trc}$ . Cells were picked from mating filters directly  
 83 as no exconjugant re-streaked on fresh selecting plates or transferred to liquid medium every survived, suggesting  
 84 that these cells are possibly false-positives. Also, please note that the bright GFP spots in the micrographs are not  
 85 from expression of PilB-GFP in the *Synechocystis* and PCC-M mutants but from expression of PilB-GFP in the *E.*  
 86 *coli* used for mating that are still present on the mating filter. Scale bars: 5  $\mu\text{m}$ .

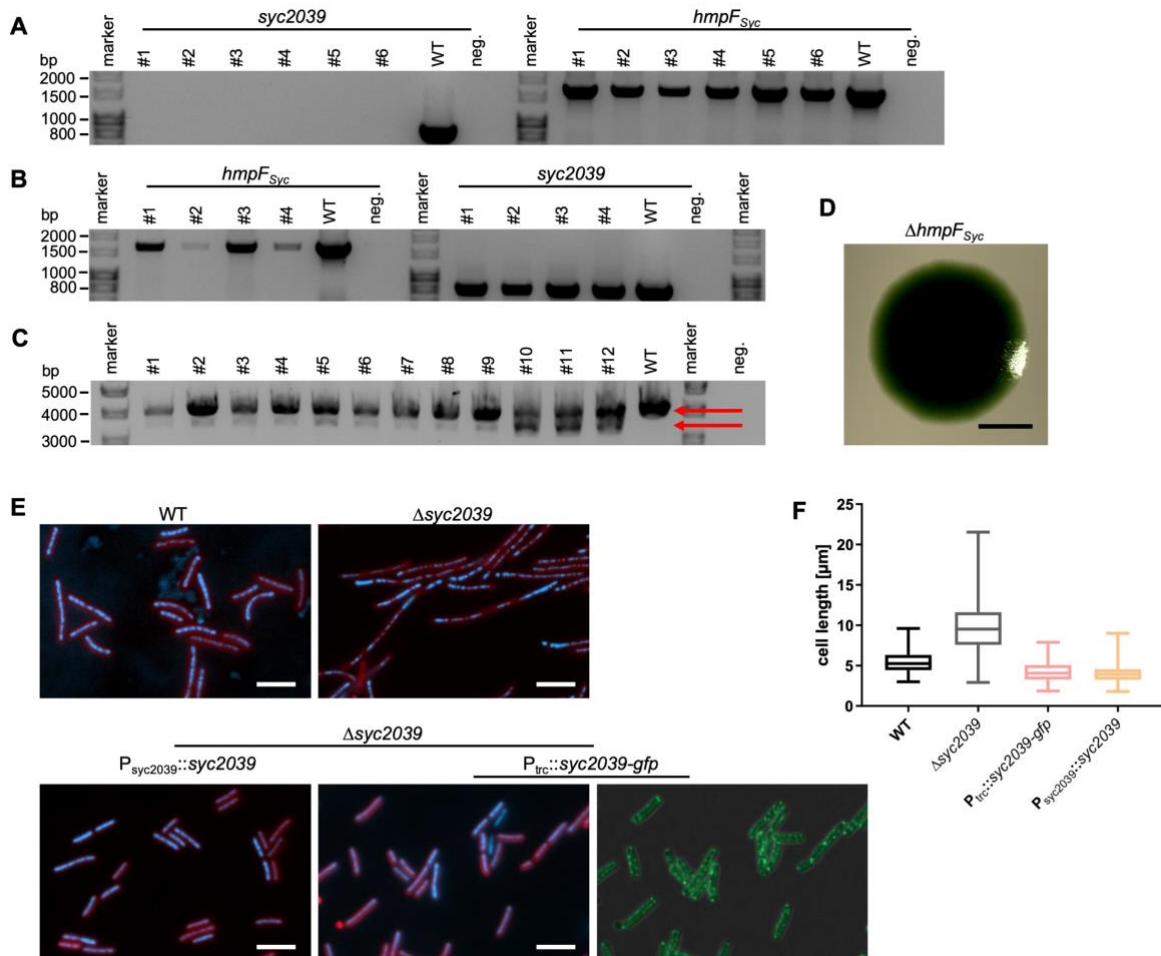

87

88 **Supplementary Fig. 6: Verification of *Synechococcus* CCRP mutants**

89 (A) Colony PCR of six  $\Delta syc2039$  mutant clones using *syc2039* gene primers (#149/#147) and *hmpF<sub>Syc</sub>* gene  
 90 (#161/#162) as a control. (B) Colony PCRs of four non-segregated  $\Delta hmpF_{Syc}$  mutant clones using *hmpF<sub>Syc</sub>* gene  
 91 primers (#174/#175) or *syc2039* gene primers (#159/#160) as a control. (C) Colony PCR of twelve non-segregated  
 92  $\Delta hmpF_{Syc}$  mutant clones using primers encompassing the homologous flanking regions used for homologous  
 93 recombination (#238/#239). Upper red arrow indicates WT allele PCR product. Lower red arrow indicates  $\Delta hmpF_{Syc}$   
 94 mutant PCR product. As a positive control, *Synechococcus* genomic DNA was included. (A-C) Full gel pictures as  
 95 shown in Extended Data Supplementary Fig. 2. (D) Growth of  $\Delta hmpF_{Syc}$  mutant on non-selective plates leads to a  
 96 reversal to WT phenotype. (E) Merged DAPI fluorescence and chlorophyll autofluorescence (red) and merged GFP  
 97 fluorescence and bright field micrographs of *Synechococcus* WT,  $\Delta syc2039$  mutant and  $\Delta syc2039$  mutant  
 98 complemented with  $P_{syc2039}::syc2039$  or  $P_{trc}::syc2039-gfp$  inserted into the neutral NS1 locus. Cells were grown in  
 99 BG11 or BG11 supplemented with 0.001 mM IPTG (for strain carrying  $P_{trc}::syc2039-gfp$ ) and stained with  
 100 10  $\mu g\ ml^{-1}$  DAPI. (F) Cell length of *Synechococcus* WT (n=505),  $\Delta syc2039$  mutant (n=517),  $\Delta syc2039$  mutant  
 101 carrying  $P_{trc}::syc2039-gfp$  (n=547) and  $\Delta syc2039$  mutant carrying  $P_{syc2039}::syc2039$  (n=529) cells.



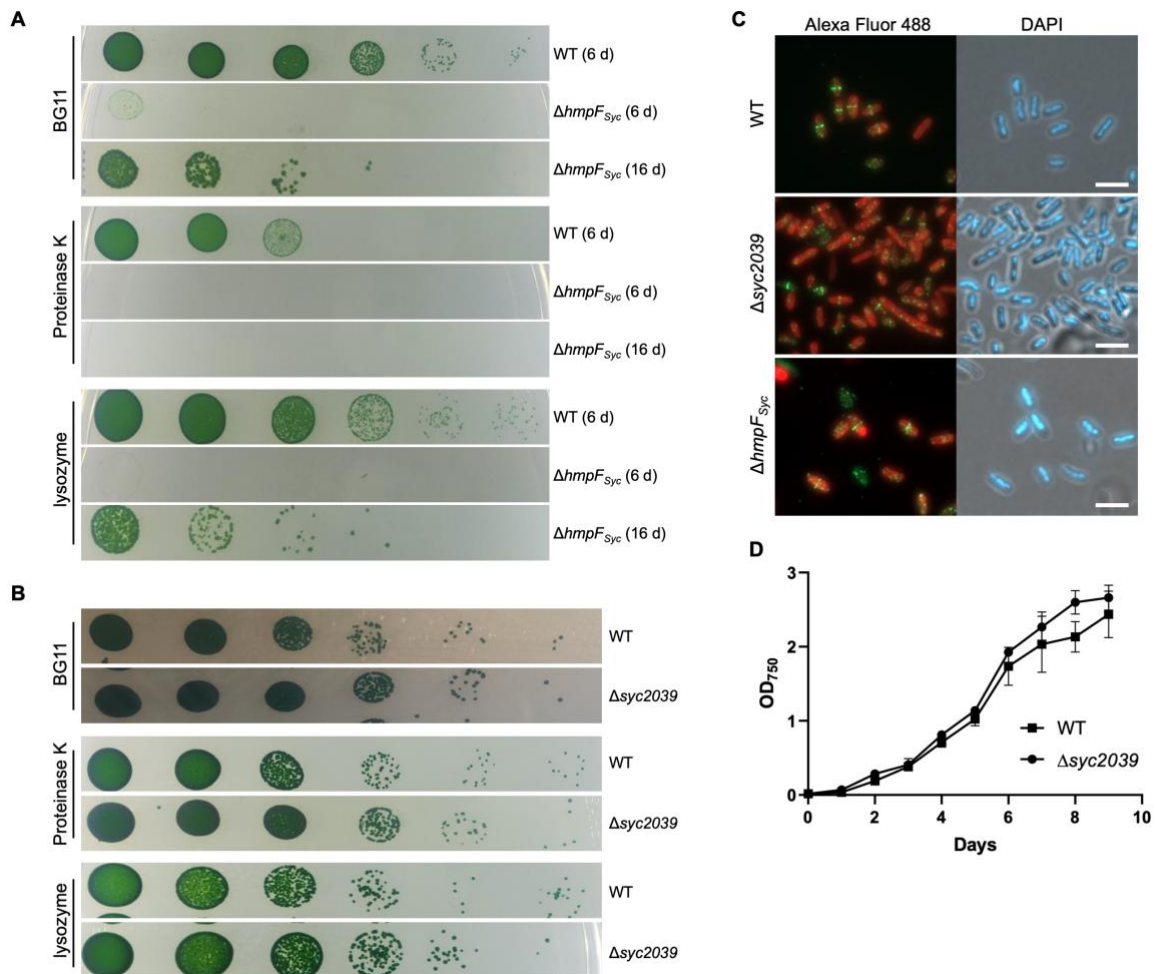

102

103

**Supplementary Fig. 7: Phenotypic characterization of *Synechococcus* mutant strains**

104

105

106

107

108

109

110

111

112

113

114

115

116

117

118

119

(A) *Synechococcus* WT (upper lane, after 6 days) and non-segregated  $\Delta hmpF_{Syc}$  mutant (middle lane: after 6 days and lower lane after 16 days) strains were grown on BG11 plates or BG11 plates supplemented with 50  $\mu\text{g ml}^{-1}$  Km. Cells were resuspended in BG11, adjusted to an OD<sub>750</sub> of 0.4 and spotted in triplicates of serial 10-fold dilutions on BG11 plates or BG11 plates supplemented with 100  $\mu\text{g ml}^{-1}$  Lysozyme or 50  $\mu\text{g ml}^{-1}$  Proteinase K. Cells were grown until no further colonies arose in the highest dilution. (B) *Synechococcus* WT and  $\Delta syc2039$  mutant strains were grown in liquid culture at standard growth conditions until an OD<sub>750</sub> of about 2.0, diluted in BG11 to an OD<sub>750</sub> of 0.4 and spotted in triplicates of serial 10-fold dilutions on BG11 plates or BG11 plates supplemented with 100  $\mu\text{g ml}^{-1}$  Lysozyme or 50  $\mu\text{g ml}^{-1}$  Proteinase K. Cells were grown until no further colonies arose in the highest dilution. (C) Merged Alexa Fluor-488 fluorescence and chlorophyll autofluorescence (red) and merged bright field and DAPI fluorescence micrographs of *Synechococcus* WT,  $\Delta syc2039$  or non-segregated  $\Delta hmpF_{Syc}$  mutant strains grown on BG11 plates and subjected to immunofluorescence staining using an anti-FtsZ primary antibody (Agrisera, raised against *Anabaena* FtsZ) and an Alexa Fluor-488 coated secondary antibody. Cells were mounted in Prolong Diamond antifade mountant with DAPI (Thermo Fischer Scientific). Scale bars: 5  $\mu\text{m}$ . (D) Growth curve of *Synechocystis* WT and  $\Delta syc2039$  mutant strain. Cells were grown in BG11, adjusted to an OD<sub>750</sub> of 0.1 and then grown in triplicates at standard growth conditions. OD<sub>750</sub> values were recorded once a day for 9 d. Error bars show the standard deviation (n=3).

120 **Extended Data Supplementary**

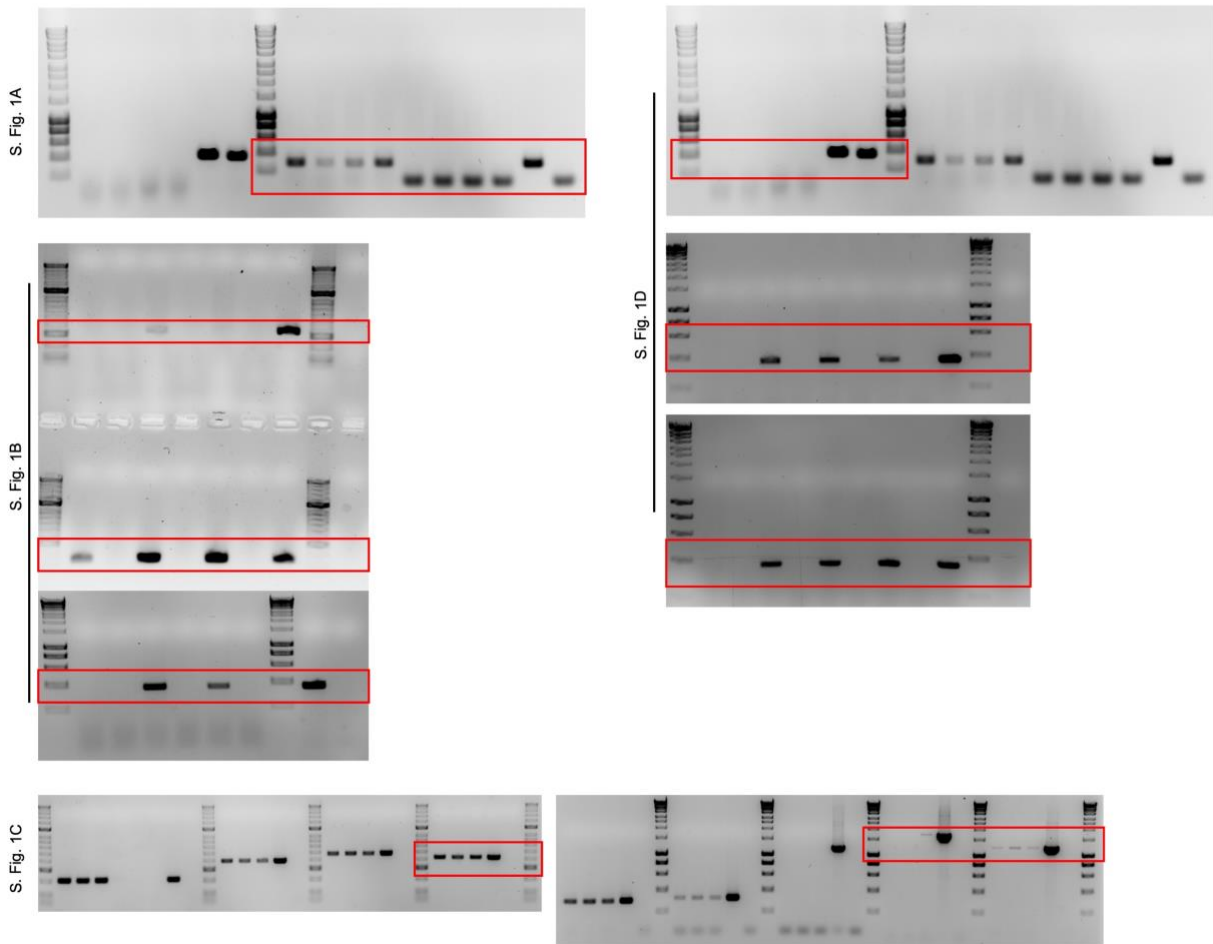

121

122 **Extended Data Supplementary Fig. 1: Full images of gel pictures used in Supplementary Fig 1.**

123 Regions shown in the gel pictures of Supplementary Fig. 1 are indicated by red boxes.

S. Fig. 6A

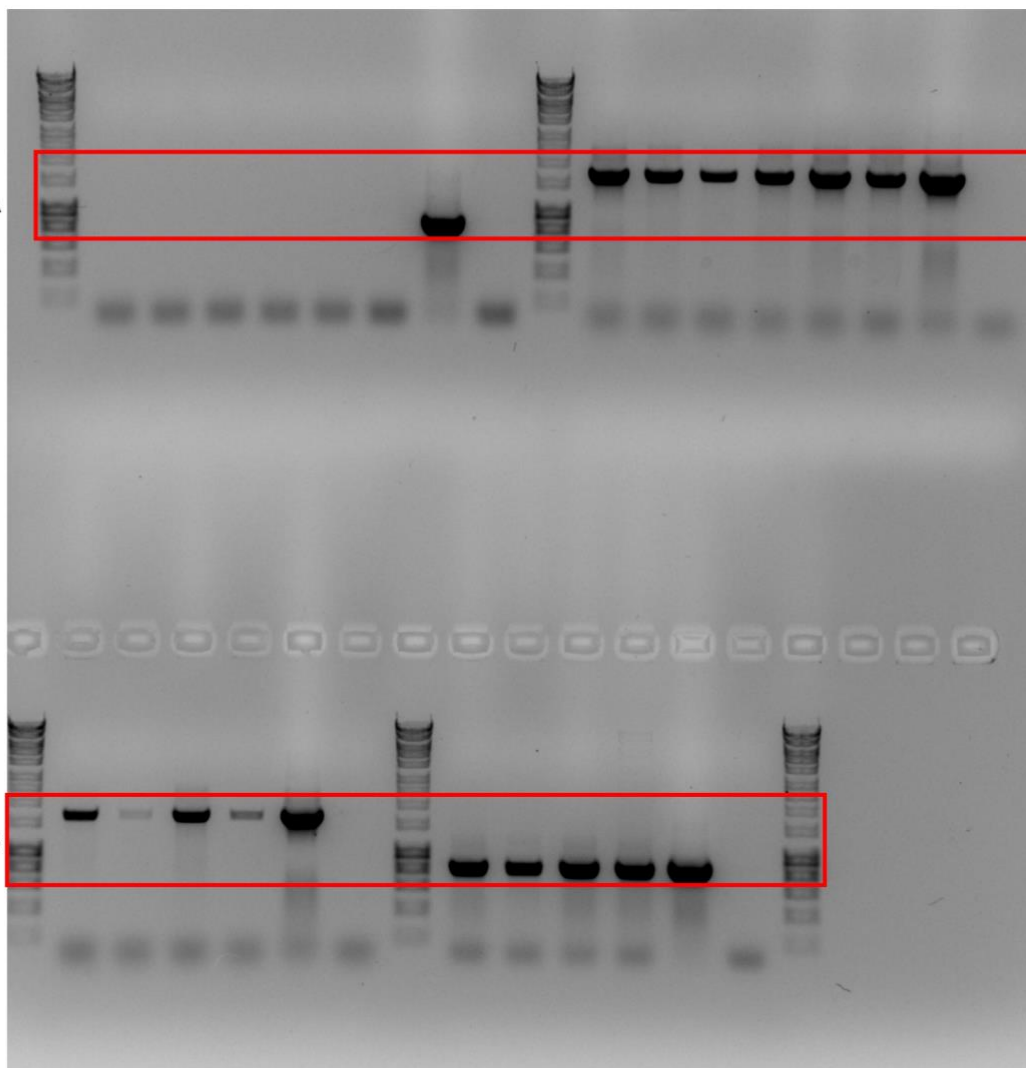

S. Fig. 6B

S. Fig. 6C

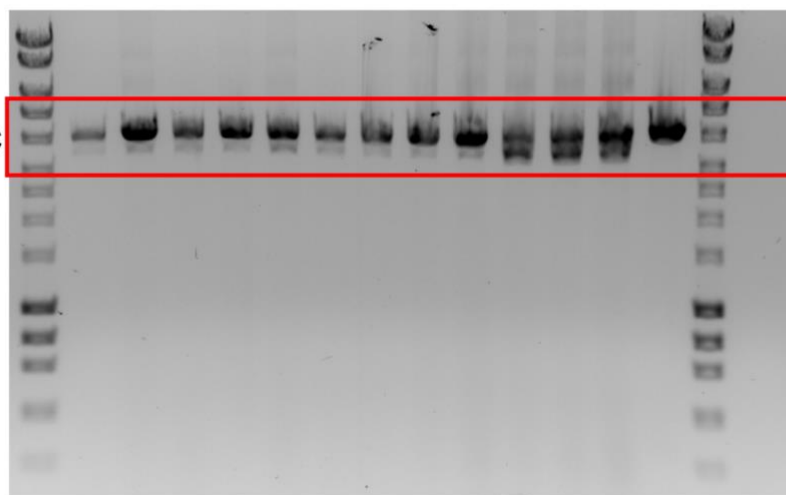

124

125 **Extended Data Supplementary Fig. 2: Full images of gels shown in Supplementary Fig. 6**

126 Regions shown in the gel pictures of Supplementary Fig. 6 are indicated by red boxes.

Supplementary Table 1: Properties of cyanobacterial CCRPs

| Gene /Locus tag   | Genus                | Subsection | Homologs distribution | Predicted proteins of similar structure (I-TASSER)                  | Homolog similarities | Conserved domains                                     | Others                                                     |
|-------------------|----------------------|------------|-----------------------|---------------------------------------------------------------------|----------------------|-------------------------------------------------------|------------------------------------------------------------|
| <i>crescentin</i> | <i>C. crescentus</i> | n/a        | n/a                   | Cytoplasmic domain of bacterial cell division protein EzrA          |                      | SMC, CCDC158                                          | IF-like CCRP                                               |
| <i>filP</i>       | <i>S. coelicolor</i> | n/a        | n/a                   | Dynein tail; $\alpha$ -Actinin; Tropomyosin                         |                      | DUF3552, SMC, RNase_Y                                 | IF-like CCRP                                               |
| <i>desmin</i>     | <i>Homo sapiens</i>  | n/a        | n/a                   | PI4KIIIa lipid kinase                                               |                      | Filament (pfam00038), SMC, Spc7, MscS_TM              | IF protein                                                 |
| <i>vimentin</i>   | <i>Homo sapiens</i>  | n/a        | n/a                   | PI4KIIIa lipid kinase                                               |                      | Filament (pfam00038), SMC, Spc7                       | IF protein                                                 |
| <i>syc2039</i>    | <i>Synechococcus</i> | I          | I                     | Tropomyosin                                                         |                      | SMC, MukB, CALCOCO1                                   | N-terminal TMD; only in <i>Synechococcus</i> sp.           |
| <i>syc1139</i>    | <i>Synechococcus</i> | I          | I, II, III, IV, V     | Cytoplasmic domain of bacterial cell division protein EzrA          | 39%                  | SMC, MukB, Spc7                                       | Homolog to <i>slr1301</i> and HmpF                         |
| <i>slr6096</i>    | <i>Synechocystis</i> | I          | I, III, IV            | Cytoplasmic domain of bacterial cell division protein EzrA          |                      | SMC                                                   |                                                            |
| <i>slr7083</i>    | <i>Synechocystis</i> | I          | I                     | Plectin                                                             |                      | SMC, MscS_TM                                          | Encoded on pSYSA plasmid, only in <i>Synechocystis</i> sp. |
| <i>slr1301</i>    | <i>Synechocystis</i> | I          | I, II, III, IV, V     | Cytoplasmic domain of bacterial cell division protein EzrA          | 39%                  | SMC, SbcC, APG6, DUF3552                              | Homolog to <i>syc1139</i> and HmpF                         |
| <i>tlr0420</i>    | <i>BP-1</i>          | I          | I, III                | Plectin                                                             |                      | SMC, MscS_TM                                          |                                                            |
| <i>fm7001</i>     | <i>Fischerella</i>   | V          | IV, V                 | $\alpha$ -catenin or vinculin; similarity to acyl-CoA dehydrogenase | 63%                  | Acetyl-CoA carboxylase carboxyl transferase (PLN0322) | Highly expressed; 3' end 9 bp overlap to <i>fm7000</i>     |
| <i>fm6009</i>     | <i>Fischerella</i>   | V          | V                     | Structure of $\beta$ -catenin and HTCF-4                            |                      | COG0610                                               |                                                            |
| <i>all4981</i>    | <i>Anabaena</i>      | IV         | III, IV, V            | TTC7B/Hyccin Complex, Clathrin                                      | 47%                  | TPR                                                   | 5' with a 4 bp overlap to <i>all4982</i>                   |

128 The first column indicates the respective gene name or locus tags of each protein candidate. The second and third column indicate the respective subsection of the corresponding  
129 cyanobacterial genus. Column four lists the subsections that contain homologous proteins to the respective CCRP. Column five indicates structural similarities of the candidate to  
130 proteins in the Protein Data Bank (PDB) based on I-TASSER<sub>2,3</sub>. The sixth column lists predicted sub-domains of protein candidates identified by BLAST Conserved Domain Search.  
131 Column seven names other features of interest. Abbreviations: (TMH) Transmembrane helix; (DUF) Domain of unknown function; (CCDC158) Coiled-coil domain-containing protein  
132 158; (SMC) Structural maintenance of chromosomes; (MukB) The hinge domain of chromosome partition protein MukB; (APG6) Autophagy protein Apg6, (SbcC) DNA repair  
133 exonuclease SbcCD ATPase; (CALCOCO1) Calcium binding and coiled-coil domain; (Spc7) Spc7 kinetochore protein; (Filament) Intermediate filament protein; (TPR):  
134 Tetratricopeptide repeat; (PLN0322) Acetyl-CoA carboxylase carboxyl transferase; (COG0610) Type I site-specific restriction-modification system. n/a: not applicable. The employed  
135 identifiers correspond to respective RefSeq accession numbers listed in the brackets: Synpcc7942\_2039 (ABB58069); Synpcc7942\_1139 (ABB57169); Slr6096 (BAD02153.1);  
136 Slr7083 (BAD01985.1); Slr1301 (BAA16854.1); Tlr0420 (NP\_681210.1); Fm7001 (WP\_016868005.1); Fm6009 (WP\_020476706); All4981 (BAB76680.1).



137 **Supplementary Table 2: Bacterial strains**

| Strain                                  | Genotype                                                                                                                                                          | Resistance | Reference                                        |
|-----------------------------------------|-------------------------------------------------------------------------------------------------------------------------------------------------------------------|------------|--------------------------------------------------|
| <i>E. coli</i> XL1 blue                 | <i>endA1 gyrA96(nal<sub>R</sub>) thi-1 recA1 relA1 lac glnV44 F' [::Tn10 proAB<sup>+</sup> lacI<sub>q</sub> Δ(lacZ)M15] hsdR17(r<sub>K</sub>- m<sub>K</sub>+)</i> | Tet        | Stratagene                                       |
| <i>E. coli</i> HB101                    | F- <i>mcrB mrr hsdS20(r<sub>B</sub>- m<sub>B</sub>-) recA13 leuB6 ara-14 proA2 lacY1 galk2 xyl-5 mtl-1 rpsL20(Sm<sub>R</sub>) glnV44 λ-</i>                       | Sm         | 4                                                |
| <i>E. coli</i> DH5α                     | F- Φ80 <i>lacZ</i> ΔM15 Δ( <i>lacZYA-argF</i> ) U169 <i>recA1 endA1 hsdR17</i> (r <sub>K</sub> -, m <sub>K</sub> +) <i>phoA supE44 λ- thi-1 gyrA96 relA1</i>      |            | 5                                                |
| <i>E. coli</i> DH5αMCR                  | F- <i>endA1 supE44 thi-1 λ- recA1 gyrA96 relA1 deoR Δ(lacZYA-argF)U169 Φ80ΔlacZΔM15 mcrA Δ(mrr hsdRMS mcrBC)</i>                                                  |            | 6                                                |
| <i>E. coli</i> BL21 (DE3)               | F- <i>ompT gal dcm lon hsdS<sub>B</sub>(r<sub>B</sub>-m<sub>B</sub>-) λ(DE3 [<i>lacI lacUV5-T7p07 ind1 sam7 nin5</i>]) [<i>malB</i>]<sub>K-12</sub>(λs)</i>       |            | 7                                                |
| <i>E. coli</i> BTH101                   | F-, <i>cya-99, araD139, galE15, galk16, rpsL1 (Str), hsdR2, mcrA, mcrB1</i>                                                                                       | Sm         | Euromedex                                        |
| <i>Fischerella muscicola</i> PCC 7414   | WT                                                                                                                                                                |            | PCC, France                                      |
| <i>Synechocystis</i> sp. PCC 6803       | Glucose tolerant Kazusa substrain WT                                                                                                                              |            | PCC, France                                      |
| BLS4                                    | Δ <i>hmpF</i> <sub>Syn</sub> ::CS.3                                                                                                                               | Sm,Sp      | This study                                       |
| BLS5                                    | Δ <i>slr7083</i> ::CS.3                                                                                                                                           | Sm,Sp      | This study                                       |
| <i>Synechocystis</i> sp. PCC-M 6803     | Glucose tolerant and motile Moscow PCC-M substrain WT                                                                                                             |            | A gift from Annegret Wilde (University Freiburg) |
| BLS6                                    | Δ <i>hmpF</i> <sub>Syn</sub> ::CS.3                                                                                                                               | Sm,Sp      | This study                                       |
| BLS7                                    | Δ <i>slr7083</i> ::CS.3                                                                                                                                           | Sm,Sp      | This study                                       |
| <i>Synechococcus elongatus</i> PCC 7942 | WT                                                                                                                                                                |            | A gift from Martin Hagemann (University Rostock) |
| BLS8                                    | Non-segregated Δ <i>hmpF</i> <sub>Syc</sub> :: <i>nptII</i>                                                                                                       | Km         | This study                                       |
| BLS9                                    | Δ <i>syc2039</i> :: <i>nptII</i>                                                                                                                                  | Km         | This study                                       |
| <i>Anabaena</i> sp. PCC 7120            | WT                                                                                                                                                                |            | PCC, France                                      |

138

| #  | Given name                        | Sequence 5' -> 3'        | Purpose                                 |
|----|-----------------------------------|--------------------------|-----------------------------------------|
| 1  | Fm7001_intern_A                   | AGCGGGAAGATGGCTACTATC    | RT-PCR                                  |
| 2  | 7001_northern                     | TCTGCGGCTTGA CTTGATAC    | RT-PCR                                  |
| 3  | qftsZ7414_fwd                     | TGGA ACTAAAGCTGCCGAGG    | RT-PCR                                  |
| 4  | qftsZ7414_rev                     | CTGTACCAGTTCCACCACCC     | RT-PCR                                  |
| 5  | Syn017_intern_A                   | TGCAACAGCAAACGGAACAG     | RT-PCR                                  |
| 6  | Syn017_intern_B                   | TTGGGAGCTAACTTGCCCAC     | RT-PCR                                  |
| 7  | rnpb 6803 primer fwd              | GGAGTTGCGGATTCTGTCA      | RT-PCR                                  |
| 8  | rnpb 6803 primer rev              | AAGACCAACCTTTGCCCTC      | RT-PCR                                  |
| 9  | Syn708_intern_A                   | TGGAGTGCCCTGCCTAACG      | RT-PCR                                  |
| 10 | Syn708_intern_B                   | CCCTTCTAACCTTTGTCCGGC    | RT-PCR                                  |
| 11 | Syc484_intern_A                   | CTACCATTCTTGGTGTGGCGG    | RT-PCR                                  |
| 12 | Syc484_intern_B                   | GAAATCCTGCGATCGCTGTTG    | RT-PCR                                  |
| 13 | Syc879_intern_A                   | CCTGTGACTTCTCTCCAGGG     | RT-PCR                                  |
| 14 | Syc879_intern_B                   | CTTTTAACTCGCGATCGCGGC    | RT-PCR                                  |
| 15 | Nos389_intern_A                   | ATCACCTGAATTAGCTGCGG     | RT-PCR                                  |
| 16 | Nos389_intern_B                   | CTAATAATGCCGCAATCAGCG    | RT-PCR                                  |
| 17 | All4982_intern_A                  | ATCAGATGGTGGAGGGAAGC     | RT-PCR                                  |
| 18 | All4983_intern_A                  | AGTAGCTGCATTTATCGGTGC    | RT-PCR                                  |
| 19 | pET19bmod-Fwd                     | GGAATTGTGAGCGGATAACAATT  | Sequencing of pET21a(+) inserts         |
| 20 | T7R                               | CTAATACGACTCACTATAGGGA   | Sequencing of pET21a(+) inserts         |
| 21 | pAM2991_Seq_A                     | GCGCCGACATCATAACGGTTC    | Sequencing of pAM2991 inserts           |
| 22 | pAM2991_Seq_B                     | GCTGAAAATCTTCTCATCCGCC   | Sequencing of pAM2991 inserts           |
| 23 | pRL153_Seq_Rev                    | AGGAGATTAACCCGCCCAAG     | Sequencing of pRL153 inserts            |
| 24 | CS3_Seq_Fwd                       | CGCGCAGATCAGTTGGAAG      | Sequencing of gene replacement plasmids |
| 25 | CS3_Seq_Rev                       | AACGTCGGTTCGAGATGGC      | Sequencing of gene replacement plasmids |
| 26 | GFP_Seq_Rev                       | TTGTGCCCATTAACATCACCATC  | Sequencing of GFP containing plasmids   |
| 27 | pJET1.2 forward sequencing primer | CGACTCACTATAGGGAGAGCGGC  | Sequencing of pJET1.2 inserts           |
| 28 | pJET1.2 reverse sequencing primer | AAGAACATCGATTTTCCATGGCAG | Sequencing of pJET1.2 inserts           |
| 29 | pKO_Seq_Fwd                       | GCCTTTTTACGGTTCCTGGC     | Sequencing pTHS121                      |

|    |                      |                                                        |                                                         |
|----|----------------------|--------------------------------------------------------|---------------------------------------------------------|
| 30 | pKO_Seq_Rev          | TCTTTTCTACGGGGTCTGACG                                  | Sequencing<br>pTHS121                                   |
| 31 | pIGA_Seq_Fwd         | TGCGCATAGAAATTGCATCA                                   | Sequencing of<br>pIGA inserts                           |
| 32 | pIGA_Seq_Rev         | GTCAGCAACACCTTCTTCA                                    | Sequencing of<br>pIGA inserts                           |
| 33 | pRL271_Seq_Fwd       | GCCTGGTGCTACGCCTGAATA                                  | Sequencing of<br>pRL271 inserts                         |
| 34 | pRL271_Seq_Rev       | CCAGTTAATAGTTTGCGCAACGTTG                              | Sequencing of<br>pRL271 inserts                         |
| 35 | pRL278_Seq_Fwd       | GGGGCGTAATTTTTTTAAGGCAGTTATTG                          | Sequencing of<br>pRL278 inserts                         |
| 36 | pSL2680_Seq_A        | CAAGAGGGCAAAAACTCAATTTG                                | Sequencing of<br>pSL2680 inserts                        |
| 37 | cpf1_1A              | TTGGTCATGAGATTATCAAAAAGGATCCT<br>GGAAAACGTTCTTCGGGGC   | Amplification of<br><i>cpf1</i> for pTHS123             |
| 38 | pRL25c_CRISPR_2<br>B | AGGCCCTTTCGTCTTCAAGAATTCTTTAC<br>ACTGATGAATGTTCCGTTGCG | Amplification of<br><i>cpf1</i> for pTHS123             |
| 39 | cpf1-1               | CTCCAGAAGCTATAAACTATGAAC                               | Sequencing of<br><i>cpf1</i>                            |
| 40 | cpf1-2               | CTACTTCAAGCTAGTGCGGAA                                  | Sequencing of<br><i>cpf1</i>                            |
| 41 | cpf1-3               | GTTGAAAATCAAGGCTACAACTAAC                              | Sequencing of<br><i>cpf1</i>                            |
| 42 | cpf1-4               | CGTTTCAAGGTAGAGAAGCAGG                                 | Sequencing of<br><i>cpf1</i>                            |
| 43 | pRL25c_Seq_Fwd       | CTTTGATCTTTTCTACGGGGTCT                                | Sequencing of<br>pRL25C inserts                         |
| 44 | pRL25c_Seq_Rev       | TTGAGGTGAGGGATGAGCG                                    | Sequencing of<br>pRL25C inserts                         |
| 45 | pMAL_Seq_Fwd         | AGAAAGGTGAAATCATGCCG                                   | Sequencing of<br>pMAL-c2x inserts                       |
| 46 | pMAL_Seq_Rev         | CTGCAAGGCGATTAAGTTGG                                   | Sequencing of<br>pMAL-c2x inserts                       |
| 47 | MB_Seq_A             | GGCTCGTATGTTGTGTGG                                     | Sequencing of<br>pKNT25, pKT25<br>and pUT18<br>inserts  |
| 48 | MB_Seq_B             | GGCTTAACTATGCGGCATC                                    | Sequencing of<br>pKNT25, pUT18<br>and pUT18C<br>inserts |
| 49 | MB_Seq_C             | TAACGCCAGGGTTTTCCCA                                    | Sequencing of<br>pKT25 inserts                          |
| 50 | pKNT25_Seq_Rev       | CGTTTGC GTAACCAGCC                                     | Sequencing of<br>pKNT25 inserts                         |
| 51 | pKT25_Seq_Fwd        | GATTCGGTGACCGATTACCTG                                  | Sequencing of<br>pKT25 inserts                          |
| 52 | pUT18_Seq_Rev        | GATGCGTTCGCGATCCAG                                     | Sequencing of<br>pUT18 inserts                          |

|    |                |                                                       |                                                                     |
|----|----------------|-------------------------------------------------------|---------------------------------------------------------------------|
| 53 | pUT18C_Seq_Fwd | TCGCCGGATGTACTIONGAAAC                                | Sequencing of pUT18C inserts                                        |
| 54 | N-term_1A      | GAGGATCCCCGGGTACC                                     | Amplification of pKNT25 and pUT18                                   |
| 55 | N-term_1B      | TAGAGTCGACCTGCAGGCA                                   | Amplification of pKNT25 and pUT18                                   |
| 56 | pKT25_1A       | CCCCGGGTACCTAAGTAAGTAAG                               | Amplification of pKT25                                              |
| 57 | pKT25_1B       | ATCCTCTAGAGTCGACCCTGC                                 | Amplification of pKT25                                              |
| 58 | pUT18C_1A      | CCGAGCTCGAATTCATCGAT                                  | Amplification of pUT18C                                             |
| 59 | pUT18C_1B      | TACCCGGGGATCCTCTAGAGT                                 | Amplification of pUT18C                                             |
| 60 | pET21a_1A      | CACCACCACCACCACCAC                                    | Amplification of pET21a(+) for gfp fusions                          |
| 61 | pET21a_1B      | ATGTATATCTCCTTCTTAAAGTTAAACAAA<br>ATTATTTCTAGAGG      | Amplification of pET21a(+) for gfp fusions                          |
| 62 | pRL271_Fwd     | GAGCTCGCGAAAGCTTGCATG                                 | Amplification of pRL271 and pRL278                                  |
| 63 | pRL271_Rev     | CTCGAGATCTAGATATCGAATTTCTGCCA<br>T                    | Amplification of pRL271                                             |
| 64 | pRL278_Rev     | CCGCTTATTATCACTTATTCAGGCG                             | Amplification of pRL278                                             |
| 65 | pETM22_Vec_R   | ATGTTTTTCGTATTTTCCCTACCAGAAGAA<br>TGATGATGATGATGG     | Amplification of pETM22                                             |
| 66 | pETM22_Vec_F   | TGGATGAACTATACAAATAAATCCGGCTG<br>CTAACAAAGC           | Amplification of pETM22                                             |
| 67 | Vector.FOR     | TGATGTTCAACTTCGACAGCGAATTCCTC<br>GACCTGCAGGG          | Amplification of pIGA                                               |
| 68 | Vector.REV     | AGGACTCTTCTCTACAGGTGGTACCCC<br>GGTTCCGAAATCG          | Amplification of pIGA                                               |
| 69 | YFP_pcp560_2A  | CATAAAGTCAAGTAGGAGATTAATTC AAT<br>GCTGAGCAAGGGCGA     | Amplification of YFP with overhang to P <sub>cp560</sub>            |
| 70 | YFP_2A         | TACAGGTTAGGAGAACGCCATGCTGAGC<br>AAGGGCG               | Amplification of YFP                                                |
| 71 | YFP-Myc_2B     | CAGATCCTCTTCAGAGATGAGTTTCTGCT<br>CCTTGACAGCTCGTCCATGC | Amplification of YFP with C-terminal <i>myc</i>                     |
| 72 | Myc+Linker_2B  | TCCTGAACCCGATCCAGAGCCCAGATCC<br>TCTTCAGAGATGAGTTTC    | Amplification of YFP with C-terminal <i>myc</i> and a GSGSGS linker |





|     |                  |                                                          |                                                                                               |
|-----|------------------|----------------------------------------------------------|-----------------------------------------------------------------------------------------------|
| 96  | Fragment 4.FOR   | TGGATGAACTATACAAATAAACCGGTGTT<br>TGGATTGTCGG             | T <sub>rbcl</sub> for pTHS60                                                                  |
| 97  | Fragment 4.REV   | CCCTGCAGGTCGAGGAATTCGCTGTCTCGA<br>AGTTGAACATCAGTAAGC     | T <sub>rbcl</sub> for pTHS60                                                                  |
| 98  | TrbcL_A          | ACCGGTGTTTGGATTGTCGG                                     | Amplification of<br>pIGA containing<br>P <sub>cpc560</sub> and T <sub>rbcl</sub><br>for pTH76 |
| 99  | pIGA_Pcpc560_1B  | TGAATTAATCTCCTACTTGACTTTATGAGT<br>TGGG                   | Amplification of<br>pIGA containing<br>P <sub>cpc560</sub> and T <sub>rbcl</sub><br>for pTH76 |
| 100 | YFP_pcpc560_2A   | CATAAAGTCAAGTAGGAGATTAATTCAAT<br>GCTGAGCAAGGGCGA         | <i>yfp-fm7001</i> for<br>pTHS76                                                               |
| 101 | 7001_TrbcL_2B    | CCGACAATCCAAACACCGGTTTCAGACTAA<br>GGCAGTCATTAATAGTGAAG   | <i>yfp-fm7001</i> for<br>pTHS76                                                               |
| 102 | 7001F_BamHI      | ACTGGATCCAGGGAAAATACGAAAAACAT<br>TGGA                    | <i>fm7001</i> for<br>pTHS63                                                                   |
| 103 | 7001R_NotI       | AGCGGCCGCTCAGACTAAGGCAGTCATT<br>AAATAGTG                 | <i>fm7001</i> for<br>pTHS63                                                                   |
| 104 | 7001F_BamHI      | GGATCCTATGAGGGAAAATACGAAAAAC                             | <i>fm7001</i> for<br>pTHS95,<br>pTHS96, pTHS97<br>and pTHS98                                  |
| 105 | 7001R_EcoRI      | AGCGAATTCTCAGACTAAGGCAGTCAT                              | <i>fm7001</i> for<br>pTHS96 and<br>pTHS98                                                     |
| 106 | 7001R_SacI       | GAGCTCCTGACTAAGGCAGTCATTA                                | <i>fm7001</i> for<br>pTHS95 and<br>pTHS97                                                     |
| 107 | 7120petER_7001ol | GTATTTTCCCTCATACTGTAGTTTTATTT<br>TTCTTATTTT              | <i>petE</i> for pTHS83<br>(overlap PCR)                                                       |
| 108 | 7001F_petEol     | AAAACCTACAGGTATGAGGGAAAATACGAA<br>AAAC                   | <i>fm7001</i> for<br>pTHS83 (overlap<br>PCR)                                                  |
| 109 | 7001R_SacI_C     | AGCGAGCTCTAAGGCAGTCATTAATAGT<br>G                        | <i>fm7001</i> for<br>pTHS83                                                                   |
| 110 | 7001F_NheI       | AACTGCTAGCAGGGAAAATACGAAAAAC                             | <i>fm7001</i> for<br>pTHS83                                                                   |
| 111 | 7001_3A          | CTCTGGATCGGGTTTCAGGAATGAGGGAA<br>AATACGAAAAACATTGG       | <i>fm7001</i> for<br>pTHS84                                                                   |
| 112 | 7001_3B          | CCTTTGCTCTTCAAGAATTCTTCAGACTAA<br>GGCAGTCATTAATAGTG      | <i>fm7001</i> for<br>pTHS84                                                                   |
| 113 | pRL271_7up_F     | AGAAATTCGATATCTAGATCTCGAGAGCA<br>ATGTGAGTGAGTTCGTGAGC    | Upstream<br>homology for<br>pTHS126                                                           |
| 114 | 7001KO_1B        | GTGCTTGCGGCAGCGTGAAGCTTGGGGT<br>TATCCTTAATAGAAGAAGAGTGC  | Upstream<br>homology for<br>pTHS126                                                           |
| 115 | 7001KO_2A        | CGCCTTCTTGACGAGTTCTTCTGAATCAA<br>GAGCATTCTTGATTTCTGTCTCA | Downstream<br>homology for<br>pTHS126                                                         |

|     |                    |                                                             |                                                                                           |
|-----|--------------------|-------------------------------------------------------------|-------------------------------------------------------------------------------------------|
| 116 | pRL271_7down_R     | CAGGCATGCAAGCTTTCGCGAGCTCTGC<br>TACCAAGACGATGCGTTTCATGTC    | Downstream<br>homology for<br>pTHS126                                                     |
| 117 | 7001KO_2A2         | AATTCGATATCTAGATCTCGAGTTGCGTT<br>TCAAAACACTACAAATTAGTACAAAC | Upstream<br>homology for<br>pTHS127                                                       |
| 118 | 7001KO_2B2         | AAGGTGCTGTGCACGGATCGGGGTTATC<br>CTTAATAGAAGAAGAGTGC         | Upstream<br>homology for<br>pTHS127                                                       |
| 119 | 7001KO_4A2         | CAAGGTAGTCGGCAAATAAATCAAGAGCA<br>TTCTTGATTCTGTCTC           | Downstream<br>homology for<br>pTHS127                                                     |
| 120 | 7001KO_4B2         | TGCAAGCTTTCGCGAGCTCCTGAAGACA<br>AAGATGAAGTTTCGATATTACC      | Downstream<br>homology for<br>pTHS127                                                     |
| 121 | trunc7001_2A       | CTGAATAAGTGATAATAAGCGGTTGCGTT<br>TCAAAACACTACAAATTAGTACAAA  | Truncated <i>fm7001</i><br>for pTHS128                                                    |
| 122 | trunc7001_2B       | TGCAAGCTTTCGCGAGCTCGTATTGATAC<br>TGGGTTGAGAATACTGC          | Truncated <i>fm7001</i><br>for pTHS128                                                    |
| 123 | 7001_gRNA_A        | AGATGAGTTTTGCACAAAGTTGGA                                    | <i>fm7001</i> gRNA for<br>pTHS121 and<br>pTHS123                                          |
| 124 | 7001_gRNA_B        | AGACTCCAACCTTTGTGCAAAACTC                                   | <i>fm7001</i> gRNA for<br>pTHS121 and<br>pTHS123                                          |
| 125 | Fm7001_HL1A        | TTGTCTAGCTTTAATGCGGTAGTTGGTAC<br>CAGGAACATCGCGTCTCTACC      | Downstream<br>homology repair<br>template for<br>pTHS121 and<br>pTHS123                   |
| 126 | Fm7001_HL1B        | AAGAATGCTCTTGATGGGTTATCCTTAA<br>TAGAAGAAGAGTGC              | Upstream<br>homology repair<br>template for<br>pTHS121 and<br>pTHS123                     |
| 127 | Fm7001_HL2A        | TATTAAGGATAACCCCATCAAGAGCATT<br>TTGATTTCTGTCTC              | Upstream<br>homology repair<br>template for<br>pTHS121 and<br>pTHS123                     |
| 128 | Fm7001_HL2B        | GATTACAGATCCTCTAGAGTCGACGGTAC<br>CTAAGGCAGCAACGTTTTCCG      | Downstream<br>homology repair<br>template for<br>pTHS121 and<br>pTHS123                   |
| 129 | Syn017_NdeI_fwd    | GCTACATATGACAAGTCAAAATTTGTTTC<br>TGAT                       | <i>slr7083</i> for<br>pTHS61                                                              |
| 130 | Syn017_XhoI_wo_rev | GCTACTCGAGTGGTAAATAAGGGGGAGT<br>GG                          | <i>slr7083</i> for<br>pTHS61                                                              |
| 131 | pIGA_V_017_R       | ACAAAATTTTGACTTGTCATTGAATTAATC<br>TCCTACTTGACTTTATGAGTTGG   | Amplification of<br>pIGA with P <sub>cpc560</sub><br>and T <sub>ribcL</sub> for<br>pTHS77 |



|     |                        |                                                              |                                         |
|-----|------------------------|--------------------------------------------------------------|-----------------------------------------|
| 153 | Syc484_KO_2B           | CTTGCGGCAGCGTGAAGCTTAGCAAAGC<br>AAAAGAAGCGATCG               | Upstream<br>homology for<br>pTHS119     |
| 154 | Syc484_KO_4A           | TTCTTGACGAGTTCTTCTGATTCTGCTGC<br>GATGCGTTAGG                 | Downstream<br>homology for<br>pTHS119   |
| 155 | Syc484_KO_4B           | CTCGAGTTTTTCAGCAAGATCAAGTAAGA<br>CTGGCTGCCATG                | Downstream<br>homology for<br>pTHS119   |
| 156 | Syc484_Seq_A           | GATGCCACCGAGCAGAATTAG                                        | Verification of<br>$\Delta$ syc2039     |
| 157 | Syc484_Seq_B           | GGCAGATCAATCAGCAGCTC                                         | Verification of<br>$\Delta$ syc2039     |
| 158 | Syc879_pET_2A          | GTTTAACTTTAAGAAGGAGATATACATAT<br>GCTCTATCTGGCTGAAGTCG        | <i>hmpF<sub>Syc</sub></i> for<br>pTHS66 |
| 159 | Syc879_pET_2B          | CAGTGGTGGTGGTGGTGGTGGGCTGCAA<br>TCAGTTGATGACT                | <i>hmpF<sub>Syc</sub></i> for<br>pTHS66 |
| 160 | Syc879_pIGA_2A         | TAAAGTCAAGTAGGAGATTAATTGATGCT<br>TCTATCTGGCTGAAAGTCGG        | <i>hmpF<sub>Syc</sub></i> for<br>pTHS81 |
| 161 | Syc879_2A              | TACAGGTTAGGAGAACGCCATGCTCTATC<br>TGGCTGAAGTCG                | <i>hmpF<sub>Syc</sub></i> for<br>pTHS93 |
| 162 | Syc879_2B              | CACTAGCAGATGCACTAGCGGCTGCAAT<br>CAGTTGATGACTG                | <i>hmpF<sub>Syc</sub></i> for<br>pTHS93 |
| 163 | Syc879_pAM2991_2<br>A  | CACACAGGAAACAGACCATGCTCTATCTG<br>GCTGAAGTCGG                 | <i>hmpF<sub>Syc</sub></i> for<br>pTHS74 |
| 164 | Syc879_KO_2A           | TGTAGGAGATCTTCTAGAAAGATCTGGAG<br>CGATCGCTATGG                | Upstream<br>homology for<br>pTHS133     |
| 165 | Syc879_KO_2B           | CTTGCGGCAGCGTGAAGCTTTATCGATG<br>CCTCGCCTTAATCAATC            | Upstream<br>homology for<br>pTHS133     |
| 166 | Syc879_KO_4A           | CCTTCTTGACGAGTTCTTCTGAGCCAGTC<br>CCCCGCGACTA                 | Downstream<br>homology for<br>pTHS133   |
| 167 | Syc879_KO_4B           | CTCGAGTTTTTCAGCAAGATGGCAAGCG<br>CAACTGAATTCTTAC              | Downstream<br>homology for<br>pTHS133   |
| 168 | Syn708_NdeI_F          | GCTACATATGCTCTATCTGGCTGAAATTA<br>AGAAA                       | <i>slr1301</i> for<br>pTHS65            |
| 169 | Syn708_XhoI_R_w/o<br>C | GCTACTCGAGACCGCCAAACAATAGGGT<br>C                            | <i>slr1301</i> for<br>pTHS65            |
| 170 | Syn708_pET_2A          | GTTTAACTTTAAGAAGGAGATATACATAT<br>GCTCTATCTGGCTGAAATTAAGAAAC  | <i>slr1301</i> for<br>pTHS67            |
| 171 | Syn708_pRL25c_Fw<br>d  | TAAACTACAGGTTAGGAGAACGCCATGC<br>TCTATCTGGCTGAAATTAAGAAACAAAC | <i>slr1301</i> for<br>pTHS91            |
| 172 | Syn708_pRL25c_Rev      | CACTAGCACTAGCAGATGCACTAGCACC<br>GCCAAACAATAGGGTCT            | <i>slr1301</i> for<br>pTHS91            |
| 173 | Syn708_3A              | CTCTGGATCGGGTTCAGGAGTGCTCTAT<br>CTGGCTGAAATTAAG              | <i>slr1301</i> for<br>pTHS92            |
| 174 | Syn708_3B              | CCTTTCGTCTTCAAGAATTCTCTAACCGC<br>CAAACAATAGGGTC              | <i>slr1301</i> for<br>pTHS92            |

|     |                  |                                                                      |                                       |
|-----|------------------|----------------------------------------------------------------------|---------------------------------------|
| 175 | 153Syn708_2A     | AGAATTAAGAGGAGAAATTAAGCATGCT<br>CTATCTGGCTGAAATTAAGAAAC              | <i>slr1301</i> for<br>pTHS82          |
| 176 | 153Syn708_2B     | TCAGAGATGAGTTTCTGCTCACCGCCAAA<br>CAATAGGGTC                          | <i>slr1301</i> for<br>pTHS82          |
| 177 | pJET708_2A       | TGTAGGAGATCTTCTAGAAAGATAATAGA<br>CTGCAATGTCAAAAACTCAG                | Upstream<br>homology for<br>pTHS131   |
| 178 | 708KO_CS3_2B     | CAAGGTGCTGTGCACGGATCAAGTCGTT<br>GTCCTGAGCAG                          | Upstream<br>homology for<br>pTHS131   |
| 179 | 708KO_CS3_4A     | CCAAGGTAGTCGGCAAATAATTGGGTTG<br>GTTGCCGAC                            | Downstream<br>homology for<br>pTHS131 |
| 180 | pJET708_4B       | CTCGAGTTTTTTCAGCAAGATTTAGCAAGG<br>TGGGGGGAATG                        | Downstream<br>homology for<br>pTHS131 |
| 181 | 708KO_1Aa        | CCTGATTCTGTGGATAACCGTACGTCAA<br>ATCGAATCCCGGTC                       | Upstream<br>homology for<br>pTHS132   |
| 182 | 708KO_1B         | TGCTTGCAGCAGCGTGAAGCTTAAGTCG<br>TTGTCTGAGCAGTG                       | Upstream<br>homology for<br>pTHS132   |
| 183 | 708KO_2A         | CGCCTTCTTGACGAGTTCTTCTGATTGGG<br>TTGGTTGCCGACTTC                     | Downstream<br>homology for<br>pTHS132 |
| 184 | 708KO_2B         | GATTATCAAAAAGGATCTTCACCTTTAGC<br>AAGGTGGGGGGAATGC                    | Downstream<br>homology for<br>pTHS132 |
| 185 | Nos389_pET_2A    | GTTTAACTTTAAGAAGGAGATATACATAT<br>GAATAGTGAGTTGTTCCAGAAGC             | <i>all4981</i> for<br>pTHS72          |
| 186 | Nos389_NdeI_F    | GCTACATATGAATAGTGAGTTGTTCCAGA<br>AG                                  | <i>all4981</i> for<br>pTHS64          |
| 187 | Nos389_XhoI_wo_R | GCTACTCGAGGATGTTACTATCACTACTT<br>TGAATTTTT                           | <i>all4981</i> for<br>pTHS64          |
| 188 | Nos389_2A        | CTACAGTTAGGAGAACGCCATGAATAGT<br>GAGTTGTTCCAGAAGCTAGC                 | <i>all4981</i> for<br>pTHS89          |
| 189 | Nos389_2B        | GCACTAGCAGATGCACTAGCGATGTTACT<br>ATCACTACTTTGAATTTTTTTGAGTTTGGC      | <i>all4981</i> for<br>pTHS89          |
| 190 | Nos389_3A        | CTCTGGATCGGGTTCAGGAATGAATAGT<br>GAGTTGTTCCAGAAGC                     | <i>all4981</i> for<br>pTHS88          |
| 191 | Nos389_3B        | CCTTTCGTCTTCAAGAATCTTTAGATGTT<br>ACTATCACTACTTTGAATTTTTTTGAG         | <i>all4981</i> for<br>pTHS88          |
| 192 | Nos389_pIGA_2A   | TAAAGTCAAGTAGGAGATTAATTCAATGA<br>ATAGTGAGTTGTTCCAGAAGC               | <i>all4981</i> for<br>pTHS79          |
| 193 | Nos389_TrbcL_2B  | CCGACAATCCAAACACCGTTTTAGATGTT<br>ACTATCACTACTTTGAATTTTTTTGAGTTT<br>G | <i>all4981</i> for<br>pTHS78          |
| 194 | 389KO_2A         | ATTCGATATCTAGATCTCGAGTGTCAGAT<br>TTAGTACTTTAAATACAAGACTTACACAC       | Upstream<br>homology for<br>pTHS129   |



|     |               |                                                           |                                                      |
|-----|---------------|-----------------------------------------------------------|------------------------------------------------------|
| 195 | 389KO_2B      | CAAGGTGCTGTGCACGGATCAGCTGTTC<br>GCTCTTGAGGG               | Upstream<br>homology for<br>pTHS129                  |
| 196 | 389KO_4A      | CCAAGGTAGTCGGCAAATAAAGTAACGC<br>GATGTGCGACT               | Downstream<br>homology for<br>pTHS129                |
| 197 | 389KO_4B      | ATGCAAGCTTTCGCGAGCTCGATTAATAC<br>CTTTGGTGTTTCATGACACTGG   | Downstream<br>homology for<br>pTHS129                |
| 198 | trunc389_2A   | CTGAATAAGTGATAATAAGCGGAAGCCAT<br>TTTAGATCGAGAGGCG         | Truncated <i>all4981</i><br>for pTHS130              |
| 199 | trunc389_2B   | TGCAAGCTTTCGCGAGCTCGCTAAATTCC<br>AAAACACTGCCTT            | Truncated <i>all4981</i><br>for pTHS130              |
| 200 | Nos389_gRNA-A | AGATCAGAAGCTAGCAAAAGCACA                                  | <i>all4981</i> gRNA for<br>pTHS124 and<br>pTHS125    |
| 201 | Nos389_gRNA-B | AGACTGTGCTTTTGCTAGCTTCTG                                  | <i>all4981</i> gRNA for<br>pTHS124 and<br>pTHS125    |
| 202 | Nos389_HL1A   | TTTGTCTAGCTTTAATGCGGTAGTTGGTA<br>CCGTGTGGGGTAATTTGCGGG    | Upstream<br>homology for<br>pTHS124 and<br>pTHS125   |
| 203 | Nos389_HL1B   | ATAAGTCGCACATCGCGTTACTTCATAGC<br>TGTTTCGCTCTTGAGG         | Upstream<br>homology for<br>pTHS124 and<br>pTHS125   |
| 204 | Nos389_HR2A   | CCTCAAGAGCGAACAGCTATGAAGTAAC<br>GCGATGTGCGACTTATTC        | Downstream<br>homology for<br>pTHS124 and<br>pTHS125 |
| 205 | Nos389_HR2B   | GGATTACAGATCCTCTAGAGTCGACGGTA<br>CCGGACACCACCAGCCATTTTC   | Downstream<br>homology for<br>pTHS124 and<br>pTHS125 |
| 206 | MB_1A         | TGCCTGCAGGTCGACTCTAATGAATAGTG<br>AGTTGTTCCAGAAGC          | <i>all4981</i> for<br>pTHS107 and<br>pTHS109         |
| 207 | MB_1B         | TCGGTACCCGGGGATCCTCGATGTTACT<br>ATCACTACTTTGAATTTTTTTGAGT | <i>All4981</i> for<br>pTHS107 and<br>pTHS109         |
| 208 | MB_2A         | AGGGTCGACTCTAGAGGATATGAATAGT<br>GAGTTGTTCCAGAAGC          | <i>all4981</i> for<br>pTHS108                        |
| 209 | MB_2B         | CTTACTTAGGTACCCGGGGATGTTACTA<br>TCACTACTTTGAATTTTTTTGAGT  | <i>all4981</i> for<br>pTHS108                        |
| 210 | MB_4A         | TCTAGAGGATCCCCGGGTAATGAATAGT<br>GAGTTGTTCCAGAAGC          | <i>all4981</i> for<br>pTHS110                        |
| 211 | MB_4B         | TCGATGAATTCGAGCTCGGGATGTTACTA<br>TCACTACTTTGAATTTTTTTGAGT | <i>all4981</i> for<br>pTHS110                        |
| 212 | MB_9A         | TGCCTGCAGGTCGACTCTAATGCTCTATC<br>TGGCTGAAATTAAGAAAC       | <i>slr1301</i> for<br>pTHS111 and<br>pTHS113         |

|     |        |                                                       |                                                         |
|-----|--------|-------------------------------------------------------|---------------------------------------------------------|
| 213 | MB_9B  | TCGGTACCCGGGGATCCTCACCGCCAAA<br>CAATAGGGT             | <i>slr1301</i> for<br>pTHS111 and<br>pTHS113            |
| 214 | MB_10A | AGGGTCTGACTCTAGAGGATATGCTCTATC<br>TGGCTGAAATTAAGAAAC  | <i>slr1301</i> for<br>pTHS112                           |
| 215 | MB_10B | CTTACTTAGGTACCCGGGGACCGCCAAA<br>CAATAGGGTC            | <i>slr1301</i> for<br>pTHS112                           |
| 216 | MB_12A | TCTAGAGGATCCCCGGGTAATGCTCTATC<br>TGGCTGAAATTAAGAAAC   | <i>slr1301</i> for<br>pTHS114                           |
| 217 | MB_12B | TCGATGAATTCGAGCTCGGACCGCCAAA<br>CAATAGGGTC            | <i>slr1301</i> for<br>pTHS114                           |
| 218 | MB_13A | TGCCTGCAGGTCGACTCTAATGACAAGTC<br>AAAATTTTGTCTGATCAAG  | <i>slr7083</i> for<br>pTHS99 and<br>pTHS101             |
| 219 | MB_13B | TCGGTACCCGGGGATCCTCTGGTAAATA<br>AGGGGGAGTGGGAC        | <i>slr7083</i> for<br>pTHS99 and<br>pTHS101             |
| 220 | MB_14A | AGGGTCTGACTCTAGAGGATATGACAAGT<br>CAAAATTTTGTCTGATCAAG | <i>slr7083</i> for<br>pTHS100                           |
| 221 | MB_14B | CTTACTTAGGTACCCGGGGTGGTAAATAA<br>GGGGGAGTGGGAC        | <i>slr7083</i> for<br>pTHS100                           |
| 222 | MB_16A | TCTAGAGGATCCCCGGGTAATGACAAGT<br>CAAAATTTTGTCTGATCAAG  | <i>slr7083</i> for<br>pTHS102                           |
| 223 | MB_16B | TCGATGAATTCGAGCTCGGTGGTAAATAA<br>GGGGGAGTGGGAC        | <i>slr7083</i> for<br>pTHS102                           |
| 224 | MB_33A | TGCCTGCAGGTCGACTCTAATGCTCTATC<br>TGGCTGAAGTCG         | <i>hmpF<sub>Syc</sub></i> for<br>pTHS115 and<br>pTHS117 |
| 225 | MB_33B | TCGGTACCCGGGGATCCTCGGCTGCAAT<br>CAGTTGATGACT          | <i>hmpF<sub>Syc</sub></i> for<br>pTHS115 and<br>pTHS117 |
| 226 | MB_34A | AGGGTCTGACTCTAGAGGATATGCTCTATC<br>TGGCTGAAGTCG        | <i>hmpF<sub>Syc</sub></i> for<br>pTHS116                |
| 227 | MB_34B | CTTACTTAGGTACCCGGGGGCTGCAAT<br>CAGTTGATGACT           | <i>hmpF<sub>Syc</sub></i> for<br>pTHS116                |
| 228 | MB_36A | TCTAGAGGATCCCCGGGTAATGCTCTATC<br>TGGCTGAAGTCG         | <i>hmpF<sub>Syc</sub></i> for<br>pTHS118                |
| 229 | MB_36B | TCGATGAATTCGAGCTCGGGGCTGCAAT<br>CAGTTGATGACT          | <i>hmpF<sub>Syc</sub></i> for<br>pTHS118                |
| 230 | MB_45A | TGCCTGCAGGTCGACTCTAATGAACTACG<br>CTCTTACCCAAG         | <i>syc2039</i> for<br>pTHS103 and<br>pTHS105            |
| 231 | MB_45B | TCGGTACCCGGGGATCCTCAGACCCTAA<br>CCAGCGGC              | <i>syc2039</i> for<br>pTHS103 and<br>pTHS105            |
| 232 | MB_46A | AGGGTCTGACTCTAGAGGATATGAACTAC<br>GCTCTTACCCAAG        | <i>syc2039</i> for<br>pTHS104                           |
| 233 | MB_46B | CTTACTTAGGTACCCGGGGAGACCCTAA<br>CCAGCGGC              | <i>syc2039</i> for<br>pTHS104                           |
| 234 | MB_48A | TCTAGAGGATCCCCGGGTAATGAACTAC<br>GCTCTTACCCAAG         | <i>syc2039</i> for<br>pTHS106                           |

|     |              |                                          |                                        |
|-----|--------------|------------------------------------------|----------------------------------------|
| 235 | MB_48B       | TCGATGAATTCGAGCTCGGAGACCCTAA<br>CCAGCGGC | <i>syc2039</i> for<br>pTHS106          |
| 236 | 708_Seq_A    | CCAACAAACTACCTACCACCAGTC                 | Verification of<br>$\Delta hmpF_{Syn}$ |
| 237 | 708_Seq_B    | CCGTAGGGATGCCTGATAAACC                   | Verification of<br>$\Delta hmpF_{Syn}$ |
| 238 | Syc879_Seq_A | CATCAGGAATGGATGCAGGAGG                   | Verification of<br>$\Delta hmpF_{Syc}$ |
| 239 | Syc879_Seq_B | GGCCGCTAATCACTTTCAGTG                    | Verification of<br>$\Delta hmpF_{Syc}$ |

| Plasmids            | Description                                                                                                                           | Resistance | Reference                                                       |
|---------------------|---------------------------------------------------------------------------------------------------------------------------------------|------------|-----------------------------------------------------------------|
| pJET1.2/<br>blunt   | <i>E. coli</i> subcloning vector                                                                                                      | Amp        | Thermo Fischer<br>Scientific                                    |
| pMAL-c2x            | Bacterial vector for expressing N-terminal MBP-tagged proteins in <i>E. coli</i> with a Factor Xa cleavage site                       | Amp        | A gift from Axel Scheidig (University of Kiel)                  |
| pet21a(+)           | Bacterial vector for expressing C-terminal 6His-tagged proteins in <i>E. coli</i>                                                     | Amp        | Novagen                                                         |
| pRL25C              | Shuttle cosmid vector for cyanobacteria and <i>E. coli</i>                                                                            | Km, Nm     | 8                                                               |
| pRL623              | Methylation plasmid                                                                                                                   | Cm         | 8                                                               |
| pRL443              | Conjugation plasmid                                                                                                                   | Amp        | 8                                                               |
| pRL271              | <i>sacB</i> containing plasmid to select for double homologous recombination in <i>Anabaena</i>                                       | Cm         | 9                                                               |
| pRL278              | <i>sacB</i> containing plasmid to select for double homologous recombination in <i>Anabaena</i>                                       | Km, Nm     | 9                                                               |
| pSL2680             | Cpf1-mediated CRISPR editing plasmid                                                                                                  | Km, Nm     | 10                                                              |
| pRL25c-<br>CRISPR   | Functional CRISPR cassette from pSL2680 transferred into EcoRI and BamHI digested pRL25c by GIBSON assembly                           | Km, Nm     | This work                                                       |
| pSM2-<br>Pcpc560ter | pMD18-T derivate for insertion into <i>pta</i> , containing P <sub>cpc560</sub> :: <i>ter</i> ::T <sub>rbcl</sub> expression cassette | Km, Amp    | A gift from Yin Li (Chinese Academy of Science), <sup>11</sup>  |
| pIGA                | Cyanobacterial vector for insertion into neutral locus (RS1 and RS2) of <i>slr0168</i> in <i>Synechocystis</i>                        | Amp, Km    | A gift from Martin Hagemann (University Rostock), <sup>12</sup> |
| pRL153-GFP          | Mobilizable broad host range vector, P <sub>trc</sub> - <i>gfp</i>                                                                    | Km, Nm     | 13                                                              |
| pKNT25              | P <sub>lac</sub> ::-T25                                                                                                               | Km         | Euromedex                                                       |
| pKT25               | P <sub>lac</sub> ::T25-                                                                                                               | Km         | Euromedex                                                       |

|                    |                                                                                                                                               |         |                                                    |
|--------------------|-----------------------------------------------------------------------------------------------------------------------------------------------|---------|----------------------------------------------------|
| pUT18              | P <sub>lac</sub> ::-T18                                                                                                                       | Amp     | Euromedex                                          |
| pUT18C             | P <sub>lac</sub> ::T18-                                                                                                                       | Amp     | Euromedex                                          |
| pKT25- <i>zip</i>  | pKT25; P <sub>lac</sub> ::T25- <i>zip</i>                                                                                                     | Km      | Euromedex                                          |
| pUT18C- <i>zip</i> | pUT18C, P <sub>lac</sub> ::T18- <i>zip</i>                                                                                                    | Amp     | Euromedex                                          |
| pAM2991            | Cyanobacterial vector for expression of proteins under the control of P <sub>trc</sub> that inserts into the NS1 site of <i>Synechococcus</i> | Sm, Sp  | A gift from Susan Golden (Addgene plasmid # 40248) |
| pTHS1              | pRL25C, P <sub>petE</sub> :: <i>alr4504-gfp</i>                                                                                               | Km, Nm  | This study                                         |
| pTHS33             | pKNT25, P <sub>lac</sub> :: <i>sepJ-T25</i>                                                                                                   | Km, Nm  | This study                                         |
| pTHS34             | pKT25, P <sub>lac</sub> ::T25- <i>sepJ</i>                                                                                                    | Km, Nm  | This study                                         |
| pTHS35             | pUT18, P <sub>lac</sub> :: <i>sepJ-T18</i>                                                                                                    | Amp     | This study                                         |
| pTHS36             | pUT18C, P <sub>lac</sub> ::T18- <i>sepJ</i>                                                                                                   | Amp     | This study                                         |
| pTHS37             | pKNT25, P <sub>lac</sub> :: <i>ftsZ-T25</i>                                                                                                   | Km, Nm  | This study                                         |
| pTHS38             | pKT25, P <sub>lac</sub> ::T25- <i>ftsZ</i>                                                                                                    | Km, Nm  | This study                                         |
| pTHS39             | pUT18, P <sub>lac</sub> :: <i>ftsZ-T18</i>                                                                                                    | Amp     | This study                                         |
| pTHS40             | pUT18C, P <sub>lac</sub> ::T18- <i>ftsZ</i>                                                                                                   | Amp     | This study                                         |
| pTHS41             | pKNT25, P <sub>lac</sub> :: <i>mreB-T25</i>                                                                                                   | Km, Nm  | This study                                         |
| pTHS42             | pKT25, P <sub>lac</sub> ::T25- <i>mreB</i>                                                                                                    | Km, Nm  | This study                                         |
| pTHS43             | pUT18, P <sub>lac</sub> :: <i>mreB-T18</i>                                                                                                    | Amp     | This study                                         |
| pTHS44             | pUT18C, P <sub>lac</sub> ::T18- <i>mreB</i>                                                                                                   | Amp     | This study                                         |
| pTHS60             | pIGA, P <sub>cpc560</sub> :: <i>fm7001-gfp</i> :T <sub>rbcL</sub>                                                                             | Amp, Km | This study                                         |
| pTHS61             | pET21a(+), P <sub>T7</sub> :: <i>slr7083-his</i>                                                                                              | Amp     | This study                                         |
| pTHS62             | pET21a(+), P <sub>T7</sub> :: <i>syc2039-his</i>                                                                                              | Amp     | This study                                         |
| pTHS63             | pET21a(+), P <sub>T7</sub> :: <i>fm7001-his</i>                                                                                               | Amp     | This study                                         |
| pTHS64             | pET21a(+), P <sub>T7</sub> :: <i>all4981-his</i>                                                                                              | Amp     | This study                                         |
| pTHS65             | pET21a(+), P <sub>T7</sub> :: <i>hmpF<sub>Syn</sub>-his</i>                                                                                   | Amp     | This study                                         |
| pTHS66             | pET21a(+), P <sub>T7</sub> :: <i>hmpF<sub>Syc</sub>-his</i>                                                                                   | Amp     | This study                                         |
| pTHS67             | pET21a(+); P <sub>T7</sub> :: <i>hmpF<sub>Syn</sub>-gfp</i>                                                                                   | Amp     | This study                                         |
| pTHS68             | pET21a(+), P <sub>T7</sub> :: <i>hmpF<sub>Syc</sub>-gfp</i>                                                                                   | Amp     | This study                                         |
| pTHS69             | pET21a(+), P <sub>T7</sub> :: <i>slr7083-gfp</i>                                                                                              | Amp     | This study                                         |
| pTHS70             | pET21a(+), P <sub>T7</sub> :: <i>fm7001-gfp</i>                                                                                               | Amp     | This study                                         |
| pTHS71             | pET21a(+), P <sub>T7</sub> :: <i>syc2039-gfp</i>                                                                                              | Amp     | This study                                         |
| pTHS72             | pET21a(+), P <sub>T7</sub> :: <i>all4981-gfp</i>                                                                                              | Amp     | This study                                         |

|         |                                                                                |         |            |
|---------|--------------------------------------------------------------------------------|---------|------------|
| pTHS73  | pMAL-c2x; P <sub>tac</sub> :: <i>mbp-fm7001-his</i>                            | Amp     | This study |
| pTHS74  | pAM2991, P <sub>trc</sub> :: <i>hmpF<sub>Syc</sub>-gfp</i>                     | Sm, Sp  | This study |
| pTHS75  | pAM2991, P <sub>trc</sub> :: <i>syc2039-gfp-his</i>                            | Sm, Sp  | This study |
| pTHS76  | pIGA, P <sub>cpc560</sub> :: <i>yfp-fm7001</i> ::T <sub>rbcl</sub>             | Amp, Km | This study |
| pTHS77  | pIGA, P <sub>cpc560</sub> :: <i>slr7083-gfp</i> ::T <sub>rbcl</sub>            | Amp, Km | This study |
| pTHS78  | pIGA, P <sub>cpc560</sub> :: <i>yfp-all4981</i> ::T <sub>rbcl</sub>            | Amp, Km | This study |
| pTHS79  | pIGA, P <sub>cpc560</sub> :: <i>all4981-gfp</i> ::T <sub>rbcl</sub>            | Amp, Km | This study |
| pTHS80  | pIGA, P <sub>cpc560</sub> :: <i>syc2039-gfp</i> ::T <sub>rbcl</sub>            | Amp, Km | This study |
| pTHS81  | pIGA, P <sub>cpc560</sub> :: <i>hmpF<sub>Syc</sub>-gfp</i> ::T <sub>rbcl</sub> | Amp, Km | This study |
| pTHS82  | pRL153, P <sub>trc</sub> :: <i>hmpF<sub>Syn</sub>-yfp</i>                      | Km, Nm  | This study |
| pTHS83  | pRL25C, P <sub>petE</sub> :: <i>fm7001-gfp</i>                                 | Km, Nm  | This study |
| pTHS84  | pRL25C, P <sub>petE</sub> :: <i>yfp-fm7001</i>                                 | Km, Nm  | This study |
| pTHS85  | pRL25C, P <sub>petE</sub> :: <i>yfp-sl7083</i>                                 | Km, Nm  | This study |
| pTHS86  | pRL25C, P <sub>petE</sub> :: <i>slr7083-gfp</i>                                | Km, Nm  | This study |
| pTHS87  | pRL25C, P <sub>petE</sub> :: <i>syc2039-gfp</i>                                | Km, Nm  | This study |
| pTHS88  | pRL25C, P <sub>petE</sub> :: <i>yfp-all4981</i>                                | Km, Nm  | This study |
| pTHS89  | pRL25C, P <sub>petE</sub> :: <i>all4981-gfp</i>                                | Km, Nm  | This study |
| pTHS90  | pRL25C, P <sub>petE</sub> - <i>creS-gfp</i>                                    | Km, Nm  | This study |
| pTHS91  | pRL25C, P <sub>petE</sub> :: <i>slr1303-gfp</i>                                | Km, Nm  | This study |
| pTHS92  | pRL25C, P <sub>petE</sub> :: <i>yfp-sl7083</i>                                 | Km, Nm  | This study |
| pTHS93  | pRL25C, P <sub>petE</sub> :: <i>hmpF<sub>Syc</sub>-gfp</i>                     | Km, Nm  | This study |
| pTHS94  | pRL25C, P <sub>all4982</sub> :: <i>all4982-ecfp</i>                            | Km, Nm  | This study |
| pTHS95  | pKNT25, P <sub>lac</sub> :: <i>fm7001-T25</i>                                  | Km, Nm  | This study |
| pTHS96  | pKT25, P <sub>lac</sub> :: <i>T25-fm7001</i>                                   | Km, Nm  | This study |
| pTHS97  | pUT18, P <sub>lac</sub> :: <i>fm7001-T18</i>                                   | Amp     | This study |
| pTHS98  | pUT18C, P <sub>lac</sub> :: <i>T18-fm7001</i>                                  | Amp     | This study |
| pTHS99  | pKNT25, P <sub>lac</sub> :: <i>slr7083-T25</i>                                 | Km, Nm  | This study |
| pTHS100 | pKT25, P <sub>lac</sub> :: <i>T25-sl7083</i>                                   | Km, Nm  | This study |
| pTHS101 | pUT18, P <sub>lac</sub> :: <i>slr7083-T18</i>                                  | Amp     | This study |
| pTHS102 | pUT18C, P <sub>lac</sub> :: <i>T18-sl7083</i>                                  | Amp     | This study |
| pTHS103 | pKNT25, P <sub>lac</sub> :: <i>syc2039-T25</i>                                 | Km, Nm  | This study |
| pTHS104 | pKT25, P <sub>lac</sub> :: <i>T25-syc2039</i>                                  | Km, Nm  | This study |



|         |                                                                                                                                       |                |            |
|---------|---------------------------------------------------------------------------------------------------------------------------------------|----------------|------------|
| pTHS105 | pUT18, P <sub>lac</sub> :: <i>syc2039-T18</i>                                                                                         | Amp            | This study |
| pTHS106 | pUT18C, P <sub>lac</sub> :: <i>T18-syc2039</i>                                                                                        | Amp            | This study |
| pTHS107 | pKNT25, P <sub>lac</sub> :: <i>all4981-T25</i>                                                                                        | Km, Nm         | This study |
| pTHS108 | pKT25, P <sub>lac</sub> :: <i>T25-all4981</i>                                                                                         | Km, Nm         | This study |
| pTHS109 | pUT18, P <sub>lac</sub> :: <i>all4981-T18</i>                                                                                         | Amp            | This study |
| pTHS110 | pUT18C, P <sub>lac</sub> :: <i>T18-all4981</i>                                                                                        | Amp            | This study |
| pTHS111 | pKNT25, P <sub>lac</sub> :: <i>hmpF<sub>Syn</sub>-T25</i>                                                                             | Km, Nm         | This study |
| pTHS112 | pKT25, P <sub>lac</sub> :: <i>T25-hmpF<sub>Syn</sub></i>                                                                              | Km, Nm         | This study |
| pTHS113 | pUT18, P <sub>lac</sub> :: <i>hmpF<sub>Syn</sub>-T18</i>                                                                              | Amp            | This study |
| pTHS114 | pUT18C, P <sub>lac</sub> :: <i>T18-hmpF<sub>Syn</sub></i>                                                                             | Amp            | This study |
| pTHS115 | pKNT25, P <sub>lac</sub> :: <i>hmpF<sub>Syc</sub>-T25</i>                                                                             | Km, Nm         | This study |
| pTHS116 | pKT25, P <sub>lac</sub> :: <i>T25-hmpF<sub>Syc</sub></i>                                                                              | Km, Nm         | This study |
| pTHS117 | pUT18, P <sub>lac</sub> :: <i>hmpF<sub>Syc</sub>-T18</i>                                                                              | Amp            | This study |
| pTHS118 | pUT18C, P <sub>lac</sub> :: <i>T18-hmpF<sub>Syc</sub></i>                                                                             | Amp            | This study |
| pTHS119 | pJET1.2/blunt with ~1000 bp upstream and downstream of <i>syc2039</i> flanking <i>nptII</i>                                           | Amp            | This study |
| pTHS120 | Circularized pUC ori with 1000 bp upstream and downstream of <i>slr7083</i> flanking <i>nptII</i> assembled by GIBSON assembly        | Km, Nm         | This study |
| pTHS121 | pSL2680 with <i>fm7001</i> gRNA and homologous repair templates 1000 bp upstream and downstream of <i>fm7001</i>                      | Km, Nm         | This study |
| pTHS122 | pRL25C containing <i>cpf1</i> , <i>lacZα</i> and pre-crRNA array with tandem spacer-repeat sequences from <i>Francisella novicida</i> | Km, Nm         | This study |
| pTHS123 | pTHS122 with <i>fm7001</i> gRNA and homologous repair templates 1000 bp upstream and downstream of <i>fm7001</i>                      | Km, Nm         | This study |
| pTHS124 | pSL2680 with <i>all4981</i> gRNA and homologous repair templates 1000 bp upstream and downstream of <i>all4981</i>                    | Km, Nm         | This study |
| pTHS125 | pTHS122 with <i>all4981</i> gRNA and homologous repair templates 1000 bp upstream and downstream of <i>all4981</i>                    | Km, Nm         | This study |
| pTHS126 | pRL271 containing 1000 bp upstream and downstream of <i>fm7001</i> flanking <i>nptII</i>                                              | Km, Nm, Cm     | This study |
| pTHS127 | pRL278 containing 2000 bp upstream and downstream of <i>fm7001</i> flanking CS.3                                                      | Km, Nm, Sm, Sp | This study |
| pTHS128 | pRL278 containing 2000 bp upstream of <i>fm7001</i> and the first 398 bp of <i>fm7001</i>                                             | Km, Nm         | This study |

|         |                                                                                                                                                              |                |            |
|---------|--------------------------------------------------------------------------------------------------------------------------------------------------------------|----------------|------------|
| pTHS129 | pRL278 containing 1000 bp upstream and downstream of <i>all4981</i> flanking CS.3                                                                            | Km, Nm, Sm, Sp | This study |
| pTHS130 | pRL278 containing 151 bp upstream of <i>all4981</i> and the first 449 bp of <i>all4981</i>                                                                   | Km, Nm         | This study |
| pTHS131 | pJET1.2/blunt with ~1000 bp upstream and downstream of <i>slr1303</i> flanking CS.3 inserted by GIBSON assembly                                              | Amp            | This study |
| pTHS132 | Circularized pUC ori with 1000 bp upstream and downstream of <i>slr1301</i> ( <i>hmpF<sub>Syn</sub></i> ) flanking <i>nptII</i> assembled by GIBSON assembly | Km, Nm         | This study |
| pTHS133 | pJET1.2/blunt with ~1000 bp upstream and downstream of <i>syc1139</i> ( <i>hmpF<sub>Syc</sub></i> ) flanking <i>nptII</i> inserted by GIBSON assembly        | Amp            | This study |

140 Restriction sites or overlapping sites are underlined.

141 Sm: streptomycin resistance; Sp: spectinomycin resistance; Amp: ampicillin resistance, Km: kanamycin  
142 resistance, Nm: neomycin resistance; Cm: chloramphenicol resistance.

- 143 • 1) The eYFP is C-terminally followed by a myc-tag, which is then followed by a heptapeptide of  
144 glycine and serine. Abbreviated: *yfp*.  
145 • 2) Modified *gfpmut3.1* in which the internal NdeI site was removed by replacing CAT by the  
146 synonymous CAC codon. The GFP is N-terminally preceded by 12 alanine and serine  
147 residues<sup>14</sup>. Abbreviated: *gfp*.  
148

## 149 Supplementary references

- 150 1. Corpet, F. Multiple sequence alignment with hierarchical clustering. *Nucleic Acids Res.*  
151 **16**, 10881–90 (1988).
- 152 2. Yang, J. & Zhang, Y. I-TASSER server: New development for protein structure and  
153 function predictions. *Nucleic Acids Res.* **43**, W174–W181 (2015).
- 154 3. Zhang, Y. I-TASSER: Fully automated protein structure prediction in CASP8. *Proteins*  
155 *Struct. Funct. Bioinforma.* **77**, 100–113 (2009).
- 156 4. Boyer, H. & Roulland-Dessoix, D. A complementation analysis of the restriction and  
157 modification of DNA in *Escherichia coli*. *J. Mol. Biol.* **41**, 459–472 (1969).
- 158 5. Meselson, M. & Yuan, R. DNA restriction enzyme from *E. coli*. *Nature* **217**, 1110–4  
159 (1968).
- 160 6. Grant, S. G., Jessee, J., Bloom, F. R. & Hanahan, D. Differential plasmid rescue from  
161 transgenic mouse DNAs into *Escherichia coli* methylation-restriction mutants. *Proc.*  
162 *Natl. Acad. Sci.* **87**, 4645–4649 (1990).

- 163 7. Studier, F. W. & Moffatt, B. A. Use of bacteriophage T7 RNA polymerase to direct  
164 selective high-level expression of cloned genes. *J. Mol. Biol.* **189**, 113–130 (1986).
- 165 8. Wolk, C. P. *et al.* Isolation and complementation of mutants of *Anabaena* sp. strain PCC  
166 7120 unable to grow aerobically on dinitrogen. *J. Bacteriol.* **170**, 1239–1244 (1988).
- 167 9. Cai, Y. & Wolk, C. P. Use of a conditionally lethal gene in *Anabaena* sp. strain PCC  
168 7120 to select for double recombinants and to entrap insertion sequences. *J. Bacteriol.*  
169 **172**, 3138–3145 (1990).
- 170 10. Ungerer, J. & Pakrasi, H. B. Cpf1 Is A Versatile Tool for CRISPR Genome Editing  
171 Across Diverse Species of Cyanobacteria. *Sci. Rep.* **6**, 1–9 (2016).
- 172 11. Zhou, J. *et al.* Discovery of a super-strong promoter enables efficient production of  
173 heterologous proteins in cyanobacteria. *Sci. Rep.* **4**, 1–6 (2014).
- 174 12. Kunert, A., Hagemann, M. & Erdmann, N. Construction of promoter probe vectors for  
175 *Synechocystis* sp. PCC 6803 using the light-emitting reporter systems Gfp and LuxAB.  
176 *J. Microbiol. Methods* **41**, 185–194 (2000).
- 177 13. Tolonen, A. C., Liszt, G. B. & Hess, W. R. Genetic manipulation of *Prochlorococcus*  
178 strain MIT9313: green fluorescent protein expression from an RSF1010 plasmid and  
179 Tn5 transposition. *Appl. Environ. Microbiol.* **72**, 7607–7613 (2006).
- 180 14. Stucken, K., Ilhan, J., Roettger, M., Dagan, T. & Martin, W. F. Transformation and  
181 conjugal transfer of foreign genes into the filamentous multicellular cyanobacteria  
182 (subsection V) *Fischerella* and *Chlorogloeopsis*. *Curr. Microbiol.* **65**, 552–560 (2012).
- 183
